# Supplementary material for: Epithelial-Mesenchymal Transformation Related Genomic Analysis Reveals Prognostic And Immunogenic Significance In Colorectal Cancer
Source: Research Square preprint supplement (doi:10.21203/rs.3.rs-903298/v1), 2021-09-30
Supplement: Supplementary file 1 [file 85aa0d2316921af7c82ab33f.csv]

	AGE	SEX	RACE	STAGE	PM	PN	PT	DFS_MONTHS	DFS_STATUS	OS_MONTHS	OS_STATUS	Cluster	Cluster_cbd
TCGA-AG-A01Y-01	49	Female		Stage II	M0	N0	T3	0	DiseaseFree	0	LIVING	1	1+2
TCGA-AA-3527-01	90	Female		Stage IIA	M0	N0	T3	0	DiseaseFree	0	LIVING	2	1+2
TCGA-AG-4015-01	85	Female		Stage IIA	M0	N0	T3	0	DiseaseFree	0	LIVING	2	1+2
TCGA-AA-3814-01	85	Female		Stage IIA	M0	N0	T3	0	DiseaseFree	0	LIVING	1	1+2
TCGA-AG-A01W-01	67	Female		Stage II	M0	N0	T3	0	DiseaseFree	0	LIVING	3	3
TCGA-AG-A01L-01	58	Male		Stage IIIB	M0	N1	T3	0	DiseaseFree	0	LIVING	2	1+2
TCGA-AA-3684-01	65	Female		Stage IV	M1	N2	T4	0	DiseaseFree	0	LIVING	2	1+2
TCGA-CK-6746-01	84	Female	WHITE	Stage IIB	MX	N0	T4b	0	DiseaseFree	0	LIVING	1	1+2
TCGA-AA-3712-01	65	Male		Stage III	M0	N2	T3	0	DiseaseFree	0	LIVING	2	1+2
TCGA-AA-3872-01	45	Male		Stage IV	M1	N2	T4	0	DiseaseFree	0	LIVING	2	1+2
TCGA-AD-A5EJ-01	74	Female	BLACK OR AFRICAN AMERICAN	Stage IIA	MX	N0	T3	0	DiseaseFree	0	LIVING	3	3
TCGA-AG-3601-01	68	Male		Stage IIIB	M0	N1	T4	0	DiseaseFree	0	LIVING	3	3
TCGA-AA-3693-01	77	Female		Stage IV	M1	N1	T4	0	DiseaseFree	0	LIVING	2	1+2
TCGA-AA-3984-01	61	Female		Stage IIA	M0	N0	T3	0	DiseaseFree	0	LIVING	3	3
TCGA-AA-A022-01	88	Female		Stage II	M0	N0	T4	0	DiseaseFree	0	LIVING	1	1+2
TCGA-CK-5915-01	63	Male	WHITE	Stage I	MX	N0	T2	0	DiseaseFree	0	LIVING	3	3
TCGA-AG-3602-01	66	Female		Stage IIIC	M0	N2	T3	0	DiseaseFree	0	LIVING	2	1+2
TCGA-AY-6196-01	47	Male	WHITE	Stage IIIC		N2b	T3	0.2	DiseaseFree	0.2	LIVING	1	1+2
TCGA-AM-5820-01	59	Female	WHITE	Stage IVA	M1	N2	T4a	0.46	DiseaseFree	0.46	LIVING	3	3
TCGA-F4-6854-01	77	Female	WHITE	Stage IIA	M0	N0	T3	0.53	DiseaseFree	0.53	LIVING	1	1+2
TCGA-AM-5821-01	68	Female	WHITE	Stage IIA	M0	N0	T3	0.92	DiseaseFree	0.92	LIVING	1	1+2
TCGA-AA-A02O-01	82	Male		Stage II	M0	N0	T3	0.92	DiseaseFree	0.92	LIVING	2	1+2
TCGA-AA-3672-01	90	Female		Stage III	M0	N1	T3	0.92	DiseaseFree	0.92	LIVING	1	1+2
TCGA-AG-3605-01	85	Female		Stage IV	M1	N1	T3	0.99	DiseaseFree	0.99	LIVING	2	1+2
TCGA-AA-3543-01	84	Male		Stage I	M0	N0	T2	0.99	DiseaseFree	0.99	LIVING	1	1+2
TCGA-AG-3727-01	78	Female		Stage III	M0	N1	T3	0.99	DiseaseFree	0.99	LIVING	2	1+2
TCGA-AG-3878-01	64	Male		Stage I	M0	N0	T2	0.99	DiseaseFree	0.99	LIVING	2	1+2
TCGA-AG-3742-01	85	Female		Stage I	M0	N0	T1	0.99	DiseaseFree	0.99	LIVING	2	1+2
TCGA-AA-A00R-01	64	Female		Stage I	M0	N0	T2	0.99	DiseaseFree	0.99	LIVING	1	1+2
TCGA-AA-3856-01	59	Male		Stage IIA	M0	N0	T3	0.99	DiseaseFree	0.99	LIVING	1	1+2
TCGA-AG-A020-01	57	Female		Stage III	M0	N1	T3	1.02	DiseaseFree	1.02	LIVING	3	3
TCGA-AA-3494-01	55	Male		Stage IV	M1	N0	T3	1.02	DiseaseFree	1.02	LIVING	2	1+2
TCGA-AG-3883-01	69	Male		Stage I	M0	N0	T2	1.02	DiseaseFree	1.02	LIVING	2	1+2
TCGA-AG-3896-01	85	Female		Stage I	M0	N0	T2	1.02	DiseaseFree	1.02	LIVING	2	1+2
TCGA-AA-3496-01	83	Female		Stage II	M0	N0	T3	1.02	DiseaseFree	1.02	LIVING	1	1+2
TCGA-AA-3514-01	81	Female		Stage I	M0	N0	T2	1.02	DiseaseFree	1.02	LIVING	2	1+2
TCGA-AA-A01V-01	59	Male		Stage I	M0	N0	T2	1.02	DiseaseFree	1.02	LIVING	3	3
TCGA-AG-A01J-01	59	Female		Stage IIA	M0	N0	T3	1.02	DiseaseFree	1.02	LIVING	2	1+2
TCGA-AA-3518-01	81	Female		Stage IIA	M0	N0	T3	1.02	DiseaseFree	1.02	LIVING	1	1+2
TCGA-AG-3586-01	72	Female		Stage III	M0	N2	T3	1.02	DiseaseFree	1.02	LIVING	1	1+2
TCGA-AA-A01S-01	47	Female		Stage III	M0	N1	T3	1.02	DiseaseFree	1.02	LIVING	2	1+2
TCGA-AA-A01Q-01	48	Female		Stage II	M0	N0	T3	1.02	DiseaseFree	1.02	LIVING	3	3
TCGA-AA-3821-01	81	Female		Stage I	M0	N0	T2	1.02	DiseaseFree	1.02	LIVING	3	3
TCGA-AG-4007-01	87	Male		Stage IV	M1	N2	T4	1.02	DiseaseFree	1.02	LIVING	2	1+2
TCGA-F4-6704-01	60	Male	AMERICAN INDIAN OR ALASKA NATIVE	Stage IIIC	MX	N2b	T3	1.54	DiseaseFree	1.54	LIVING	1	1+2
TCGA-AA-3966-01	89	Female		Stage IIA	M0	N0	T3	2	DiseaseFree	2	LIVING	1	1+2
TCGA-CK-6748-01	45	Female	WHITE	Stage IV	M1	N1	T3	2	DiseaseFree	2	LIVING	2	1+2
TCGA-EF-5830-01	54	Male	WHITE	Stage IIB	M0	N0	T4a	3.48	DiseaseFree	3.48	LIVING	2	1+2
TCGA-EF-5831-01	72	Male	WHITE	Stage IIA	M0	N0	T3	4.17	DiseaseFree	4.17	LIVING	1	1+2
TCGA-4N-A93T-01	67	Male	BLACK OR AFRICAN AMERICAN	Stage IIIB	M0	N1b	T4a	4.8	DiseaseFree	4.8	LIVING	2	1+2
TCGA-AA-3681-01	77	Female		Stage III	M0	N1	T3	5.98	DiseaseFree	5.98	LIVING	1	1+2
TCGA-AG-A00C-01	49	Female		Stage IIIB	M0	N1	T3	6.01	DiseaseFree	6.01	LIVING	2	1+2
TCGA-AA-3662-01	80	Female		Stage IV	M1	N2	T4	6.04	DiseaseFree	6.04	LIVING	1	1+2
TCGA-AG-3600-01	62	Male		Stage IIIC	M0	N2	T3	6.04	DiseaseFree	6.04	LIVING	3	3
TCGA-AA-3663-01	42	Male		Stage II	M0	N0	T3	6.96	DiseaseFree	6.96	LIVING	3	3
TCGA-AG-3581-01	63	Male		Stage I	M0	N0	T2	7.06	DiseaseFree	7.06	LIVING	3	3
TCGA-CL-5918-01	90	Female	WHITE	Stage IIA	MX	N0	T3	7.16	DiseaseFree	7.16	LIVING	2	1+2
TCGA-D5-6898-01	51	Female	WHITE	Stage I	M0	N0	T2	7.52	DiseaseFree	7.52	LIVING	1	1+2
TCGA-AG-3726-01	63	Female		Stage I	M0	N0	T2	7.98	DiseaseFree	7.98	LIVING	2	1+2
TCGA-CM-4750-01	34	Female	WHITE	Stage IIIA	M0	N1b	T1	8.02	DiseaseFree	8.02	LIVING	2	1+2
TCGA-AG-3580-01	67	Male		Stage I	M0	N0	T1	8.02	DiseaseFree	8.02	LIVING	3	3
TCGA-AA-3525-01	90	Male		Stage IIIB	M0	N1	T3	8.05	DiseaseFree	8.05	LIVING	3	3
TCGA-G4-6295-01	70	Female	WHITE	Stage II	M0	N0	T3	8.34	DiseaseFree	8.34	LIVING	1	1+2
TCGA-A6-6141-01	31	Male	BLACK OR AFRICAN AMERICAN	Stage IIA	M0	N0	T3	8.38	DiseaseFree	8.38	LIVING	3	3
TCGA-EI-7004-01	37	Female	WHITE		M0	N2b	T4a	8.44	DiseaseFree	8.44	LIVING	2	1+2
TCGA-EI-6882-01	59	Male	WHITE	Stage IIA	M0	N0	T3	8.61	DiseaseFree	8.61	LIVING	3	3
TCGA-D5-6926-01	65	Male	WHITE	Stage IIIB	M0	N1	T4a	9.03	DiseaseFree	9.03	LIVING	1	1+2
TCGA-AG-A016-01	55	Male		Stage IV	M1	N2	T3	9.07	DiseaseFree	9.07	LIVING	2	1+2
TCGA-AA-3519-01	63	Male		Stage III	M0	N1	T3	9.07	DiseaseFree	9.07	LIVING	3	3
TCGA-D5-6927-01	34	Male	WHITE	Stage IIA	M0	N0	T3	9.43	DiseaseFree	9.43	LIVING	1	1+2
TCGA-A6-A5ZU-01	59	Male	BLACK OR AFRICAN AMERICAN	Stage IIIB	M0	N1	T3	9.63	DiseaseFree	9.63	LIVING	1	1+2
TCGA-CM-6679-01	58	Male	WHITE	Stage IIA	M0	N0	T3	10.05	DiseaseFree	10.05	LIVING	2	1+2
TCGA-D5-6922-01	76	Male	WHITE	Stage IIIA	M0	N1	T3	10.12	DiseaseFree	10.12	LIVING	2	1+2
TCGA-D5-7000-01	79	Female	WHITE	Stage I	M0	N0	T2	10.25	DiseaseFree	10.25	LIVING	3	3
TCGA-EI-6884-01	71	Male	WHITE	Stage IIIA	M0	N1	T3	10.78	DiseaseFree	10.78	LIVING	2	1+2
TCGA-CM-6172-01	70	Female	WHITE	Stage IIIB	M0	N1a	T3	11.01	DiseaseFree	11.01	LIVING	3	3
TCGA-CM-6677-01	75	Female	WHITE	Stage IIA	M0	N0	T3	11.07	DiseaseFree	11.07	LIVING	1	1+2
TCGA-CM-6676-01	82	Male	WHITE	Stage I	M0	N0	T2	11.07	DiseaseFree	11.07	LIVING	2	1+2
TCGA-D5-6932-01	69	Male	WHITE	Stage IIA	M0	N0	T3	11.37	DiseaseFree	11.37	LIVING	2	1+2
TCGA-EI-6883-01	63	Male	WHITE	Stage IIC	M0	N0	T3	11.5	DiseaseFree	11.5	LIVING	1	1+2
TCGA-D5-6928-01	80	Male	WHITE	Stage IIA	M0	N0	T3	11.63	DiseaseFree	11.63	LIVING	1	1+2
TCGA-AF-A56N-01	47	Female	BLACK OR AFRICAN AMERICAN	Stage IIA	M0	N0	T3	11.83	DiseaseFree	11.83	LIVING	2	1+2
TCGA-EI-7002-01	58	Male	WHITE	Stage IV	M1	N2	T3	11.96	DiseaseFree	11.96	LIVING	2	1+2
TCGA-DC-6154-01	57	Female	WHITE	Stage IVA	M1	N2b	T4a	11.99	DiseaseFree	11.99	LIVING	2	1+2
TCGA-CM-6162-01	48	Female	WHITE	Stage IIIB	M0	N1a	T3	11.99	DiseaseFree	11.99	LIVING	1	1+2
TCGA-D5-6931-01	77	Male	WHITE	Stage IIIC	M0	N2	T4b	11.99	DiseaseFree	11.99	LIVING	3	3
TCGA-AG-3575-01	51	Male		Stage II	M0	N0	T3	11.99	DiseaseFree	11.99	LIVING	1	1+2
TCGA-AA-A01G-01	63	Male		Stage IIA	M0	N0	T3	11.99	DiseaseFree	11.99	LIVING	3	3
TCGA-CM-6680-01	78	Female	WHITE	Stage IIIB	M0	N2a	T3	12.02	DiseaseFree	12.02	LIVING	1	1+2
TCGA-AG-3599-01	70	Male		Stage I	M0	N0	T2	12.02	DiseaseFree	12.02	LIVING	3	3
TCGA-AD-5900-01	67	Male	WHITE	Stage I	MX	N0	T2	12.16	DiseaseFree	12.16	LIVING	1	1+2
TCGA-CA-6716-01	65	Male	ASIAN	Stage IIA	M0	N0	T3	12.19	DiseaseFree	12.19	LIVING	2	1+2
TCGA-CA-5255-01	45	Male	ASIAN	Stage IIA	M0	N0	T3	12.35	DiseaseFree	12.35	LIVING	3	3
TCGA-CA-5796-01	52	Female	ASIAN	Stage IIA	M0	N0	T3	12.39	DiseaseFree	12.39	LIVING	3	3
TCGA-D5-6920-01	77	Female	WHITE	Stage IIA	M0	N0	T3	12.39	DiseaseFree	12.39	LIVING	3	3
TCGA-D5-6923-01	57	Male	WHITE	Stage I	M0	N0	T2	12.42	DiseaseFree	12.42	LIVING	2	1+2
TCGA-F5-6864-01	74	Female	WHITE	Stage IIIB	M0	N2a	T3	12.45	DiseaseFree	12.45	LIVING	1	1+2
TCGA-CA-5256-01	54	Female	ASIAN	Stage IIA	M0	N0	T3	12.45	DiseaseFree	12.45	LIVING	2	1+2
TCGA-D5-6539-01	45	Female	WHITE		M0	N0	T3	12.48	DiseaseFree	12.48	LIVING	3	3
TCGA-CA-6715-01	63	Male	ASIAN	Stage IIIB	M0	N1	T3	12.58	DiseaseFree	12.58	LIVING	2	1+2
TCGA-CA-5797-01	56	Male	ASIAN	Stage IIA	M0	N0	T3	12.58	DiseaseFree	12.58	LIVING	1	1+2
TCGA-DT-5265-01	51	Male	ASIAN	Stage II	M0	N0	T3	12.61	DiseaseFree	12.61	LIVING	2	1+2
TCGA-4T-AA8H-01	42	Female	BLACK OR AFRICAN AMERICAN	Stage IIA	MX	N0	T3	12.65	DiseaseFree	12.65	LIVING	3	3
TCGA-CA-5254-01	42	Female	ASIAN	Stage IIA	M0	N0	T3	12.68	DiseaseFree	12.68	LIVING	3	3
TCGA-CA-6717-01	57	Male	ASIAN	Stage IIA	M0	N0	T3	12.75	DiseaseFree	12.75	LIVING	1	1+2
TCGA-NH-A6GC-01	66	Female	BLACK OR AFRICAN AMERICAN	Stage IVB	M1	N1b	T4b	12.78	DiseaseFree	12.78	LIVING	2	1+2
TCGA-CM-6674-01	39	Male	WHITE	Stage IIA	M0	N0	T3	12.94	DiseaseFree	12.94	LIVING	1	1+2
TCGA-CM-6168-01	84	Female	BLACK OR AFRICAN AMERICAN	Stage IIA	M0	N0	T3	12.98	DiseaseFree	12.98	LIVING	3	3
TCGA-AA-3939-01	83	Male		Stage IIA	M0	N0	T3	12.98	DiseaseFree	12.98	LIVING	1	1+2
TCGA-AA-3542-01	69	Male		Stage IIIC	M0	N2	T3	12.98	DiseaseFree	12.98	LIVING	2	1+2
TCGA-AG-3892-01	57	Female		Stage I	M0	N0	T1	13.01	DiseaseFree	13.01	LIVING	1	1+2
TCGA-CM-6169-01	67	Male	BLACK OR AFRICAN AMERICAN	Stage IIA	M0	N0	T3	13.01	DiseaseFree	13.01	LIVING	1	1+2
TCGA-CM-4752-01	58	Male	BLACK OR AFRICAN AMERICAN	Stage IIA	M0	N0	T3	13.01	DiseaseFree	13.01	LIVING	1	1+2
TCGA-AA-3973-01	69	Male		Stage IV	M1	N1	T4	13.04	DiseaseFree	13.04	LIVING	2	1+2
TCGA-D5-6930-01	67	Male	WHITE	Stage IIA	M0	N0	T3	13.34	DiseaseFree	13.34	LIVING	1	1+2
TCGA-D5-6929-01	49	Female	WHITE	Stage IV	M1	N1	T3	13.4	DiseaseFree	13.4	LIVING	2	1+2
TCGA-G4-6323-01	50	Male	BLACK OR AFRICAN AMERICAN	Stage IA	MX	N0	Tis	13.76	DiseaseFree	13.76	LIVING	3	3
TCGA-CI-6621-01	63	Male	WHITE	Stage IIIB	MX	N1	T3	13.76	DiseaseFree	13.76	LIVING	1	1+2
TCGA-AG-A008-01	50	Female		Stage I	M0	N0	T2	13.93	DiseaseFree	13.93	LIVING	3	3
TCGA-AA-3561-01	72	Male		Stage IIA	M0	N0	T3	13.93	DiseaseFree	13.93	LIVING	3	3
TCGA-AA-A004-01	76	Male		Stage IIA	M0	N0	T3	13.93	DiseaseFree	13.93	LIVING	2	1+2
TCGA-AG-3611-01	72	Male		Stage IIA	M0	N0	T3	13.93	DiseaseFree	13.93	LIVING	2	1+2
TCGA-DC-6155-01	31	Female	WHITE	Stage IIIA	M0	N1b	T2	13.96	DiseaseFree	13.96	LIVING	2	1+2
TCGA-AG-3894-01	65	Male		Stage IIA	M0	N0	T3	13.99	DiseaseFree	13.99	LIVING	3	3
TCGA-AA-3544-01	68	Male		Stage I	M0	N0	T2	13.99	DiseaseFree	13.99	LIVING	1	1+2
TCGA-AA-3667-01	36	Female		Stage I	M0	N0	T2	13.99	DiseaseFree	13.99	LIVING	2	1+2
TCGA-AG-4005-01	64	Male		Stage IV	M1	N2	T3	14.03	DiseaseFree	14.03	LIVING	2	1+2
TCGA-CM-6163-01	74	Male	WHITE	Stage I	M0	N0	T1	14.03	DiseaseFree	14.03	LIVING	1	1+2
TCGA-CM-6171-01	77	Female	WHITE	Stage I	M0	N0	T2	14.03	DiseaseFree	14.03	LIVING	3	3
TCGA-D5-6924-01	68	Male	WHITE	Stage IIA	M0	N0	T3	14.29	DiseaseFree	14.29	LIVING	1	1+2
TCGA-AU-3779-01	80	Female	WHITE	Stage IIA	M0	N0	T3	14.49	DiseaseFree	14.49	LIVING	2	1+2
TCGA-CM-6167-01	57	Female	BLACK OR AFRICAN AMERICAN	Stage IIIC	M0	N2b	T3	14.98	DiseaseFree	14.98	LIVING	1	1+2
TCGA-AA-A00W-01	80	Male		Stage I	M0	N0	T1	14.98	DiseaseFree	14.98	LIVING	2	1+2
TCGA-CM-6170-01	73	Female	WHITE	Stage I	M0	N0	T2	15.01	DiseaseFree	15.01	LIVING	2	1+2
TCGA-CM-5863-01	60	Female	WHITE	Stage IIIB	M0	N1b	T3	15.01	DiseaseFree	15.01	LIVING	2	1+2
TCGA-AA-A017-01	57	Female		Stage IIA	M0	N0	T3	15.01	DiseaseFree	15.01	LIVING	2	1+2
TCGA-CM-5864-01	60	Male	WHITE	Stage I	M0	N0	T2	15.01	DiseaseFree	15.01	LIVING	2	1+2
TCGA-AA-A01C-01	75	Male		Stage IIIA	M0	N1	T2	15.01	DiseaseFree	15.01	LIVING	2	1+2
TCGA-AA-3679-01	59	Male		Stage IV	M1	N2	T3	15.01	DiseaseFree	15.01	LIVING	2	1+2
TCGA-CM-6161-01	36	Female	WHITE	Stage I	M0	N0	T2	15.01	DiseaseFree	15.01	LIVING	2	1+2
TCGA-D5-6535-01	80	Female	WHITE	Stage IIIB	MX	N1	T3	15.11	DiseaseFree	15.11	LIVING	1	1+2
TCGA-D5-6541-01	49	Male	WHITE	Stage IIA	M0	N0	T3	15.57	DiseaseFree	15.57	LIVING	1	1+2
TCGA-CK-4952-01	48	Female	WHITE	Stage IIIC	M0	N2	T4	15.6	DiseaseFree	15.6	LIVING	3	3
TCGA-NH-A6GB-01	71	Female	BLACK OR AFRICAN AMERICAN	Stage IIIC	MX	N2b	T3	15.64	DiseaseFree	15.64	LIVING	2	1+2
TCGA-EI-6511-01	52	Male	WHITE	Stage IIIB	M0	N1	T3	15.83	DiseaseFree	15.83	LIVING	1	1+2
TCGA-AG-3608-01	79	Female		Stage IIA	M0	N0	T3	15.93	DiseaseFree	15.93	LIVING	1	1+2
TCGA-AG-A014-01	86	Male		Stage I	M0	N0	T2	15.93	DiseaseFree	15.93	LIVING	2	1+2
TCGA-AA-3833-01	63	Female		Stage IIA	M0	N0	T3	15.93	DiseaseFree	15.93	LIVING	3	3
TCGA-CM-6165-01	74	Male	WHITE	Stage IIA	M0	N0	T3	16.03	DiseaseFree	16.03	LIVING	1	1+2
TCGA-AA-3971-01	58	Male		Stage III	M0	N1	T3	16.06	DiseaseFree	16.06	LIVING	1	1+2
TCGA-D5-6540-01	66	Male	WHITE	Stage I	M0	N0	T2	16.13	DiseaseFree	16.13	LIVING	3	3
TCGA-EI-6514-01	59	Female	WHITE	Stage IIA	M0	N0	T3	16.29	DiseaseFree	16.29	LIVING	2	1+2
TCGA-EI-6513-01	59	Male	WHITE	Stage IIIB	M0	N1	T3	16.33	DiseaseFree	16.33	LIVING	1	1+2
TCGA-EI-6881-01	60	Male	WHITE	Stage IIIA	M0	N1	T3	16.39	DiseaseFree	16.39	LIVING	2	1+2
TCGA-AD-A5EK-01	51	Male	BLACK OR AFRICAN AMERICAN	Stage I	MX	N0	T2	16.43	DiseaseFree	16.43	LIVING	2	1+2
TCGA-AA-A00U-01	50	Male		Stage IIIB	M0	N1	T3	17.02	DiseaseFree	17.02	LIVING	3	3
TCGA-AG-4008-01	63	Male		Stage IIA	M0	N0	T3	17.02	DiseaseFree	17.02	LIVING	2	1+2
TCGA-CM-5868-01	59	Female	WHITE	Stage IVA	M1	N1a	T4a	17.02	DiseaseFree	17.02	LIVING	2	1+2
TCGA-AA-3846-01	74	Female		Stage IIA	M0	N0	T3	17.02	DiseaseFree	17.02	LIVING	2	1+2
TCGA-AG-3890-01	62	Male		Stage I	M0	N0	T2	17.02	DiseaseFree	17.02	LIVING	2	1+2
TCGA-AA-3866-01	78	Female		Stage I	M0	N0	T2	17.02	DiseaseFree	17.02	LIVING	1	1+2
TCGA-D5-6538-01	79	Female	WHITE	Stage IIIB	M0	N2	T3	17.12	DiseaseFree	17.12	LIVING	2	1+2
TCGA-EI-6917-01	33	Male	WHITE	Stage IIIA	M0	N1	T3	17.44	DiseaseFree	17.44	LIVING	1	1+2
TCGA-AH-6549-01	66	Male	WHITE		MX	NX	T3	17.48	DiseaseFree	17.48	LIVING	2	1+2
TCGA-EI-6512-01	64	Female	WHITE	Stage IIIB	M0	N1	T3	17.67	DiseaseFree	17.67	LIVING	1	1+2
TCGA-D5-6531-01	75	Male	WHITE	Stage IIA	M0	N0	T3	17.74	DiseaseFree	17.74	LIVING	1	1+2
TCGA-AY-6386-01	66	Female	BLACK OR AFRICAN AMERICAN	Stage IIIB	M0	N1a	T3	17.81	DiseaseFree	17.81	LIVING	3	3
TCGA-NH-A8F7-06	53	Female	BLACK OR AFRICAN AMERICAN	Stage IIA	MX	N0	T3	17.84	DiseaseFree	17.84	LIVING	2	1+2
TCGA-NH-A8F7-01	53	Female	BLACK OR AFRICAN AMERICAN	Stage IIA	MX	N0	T3	17.84	DiseaseFree	17.84	LIVING	2	1+2
TCGA-AY-A69D-01	55	Female	BLACK OR AFRICAN AMERICAN	Stage IIA	M0	N0	T3	17.84	DiseaseFree	17.84	LIVING	3	3
TCGA-AG-3885-01	71	Female		Stage IIIB	M0	N1	T3	17.94	DiseaseFree	17.94	LIVING	2	1+2
TCGA-AA-3554-01	62	Female		Stage IIA	M0	N0	T3	17.94	DiseaseFree	17.94	LIVING	3	3
TCGA-AA-3831-01	66	Male		Stage IIA	M0	N0	T3	17.97	DiseaseFree	17.97	LIVING	3	3
TCGA-AA-A00K-01	79	Male		Stage IIA	M0	N0	T3	18.04	DiseaseFree	18.04	LIVING	3	3
TCGA-AA-A00J-01	80	Male		Stage IIIB	M0	N1	T4	18.04	DiseaseFree	18.04	LIVING	3	3
TCGA-AA-3875-01	78	Female		Stage I	M0	N0	T1	18.04	DiseaseFree	18.04	LIVING	3	3
TCGA-NH-A50T-01	68	Female	BLACK OR AFRICAN AMERICAN	Stage IIA	MX	N0	T3	18.17	DiseaseFree	18.17	LIVING	3	3
TCGA-D5-6532-01	61	Male	WHITE	Stage IIA	M0	N0	T3	18.23	DiseaseFree	18.23	LIVING	2	1+2
TCGA-EI-6510-01	77	Female	WHITE		MX	N0	T2	18.27	DiseaseFree	18.27	LIVING	3	3
TCGA-AY-A8YK-01	44	Male	BLACK OR AFRICAN AMERICAN	Stage IVA	M1	N2a	T3	18.82	DiseaseFree	18.82	LIVING	2	1+2
TCGA-AA-A00D-01	70	Male		Stage I	M0	N0	T2	18.99	DiseaseFree	18.99	LIVING	1	1+2
TCGA-AA-3688-01	80	Male		Stage IV	M1	N1	T3	18.99	DiseaseFree	18.99	LIVING	2	1+2
TCGA-AG-3881-01	83	Female		Stage IIA	M0	N0	T3	19.02	DiseaseFree	19.02	LIVING	2	1+2
TCGA-AA-3713-01	68	Male		Stage IV	M1	N0	T3	19.02	DiseaseFree	19.02	LIVING	1	1+2
TCGA-AA-3986-01	73	Male		Stage I	M0	N0	T2	19.05	DiseaseFree	19.05	LIVING	1	1+2
TCGA-AA-3526-01	57	Male		Stage I	M0	N0	T2	19.05	DiseaseFree	19.05	LIVING	1	1+2
TCGA-AA-3530-01	80	Male		Stage I	M0	N0	T2	19.05	DiseaseFree	19.05	LIVING	3	3
TCGA-NH-A50V-01	69	Male	BLACK OR AFRICAN AMERICAN	Stage IIIB	M0	N2a	T3	19.32	DiseaseFree	19.32	LIVING	1	1+2
TCGA-NH-A5IV-01	90	Female	BLACK OR AFRICAN AMERICAN	Stage IIA	MX	N0	T3	19.32	DiseaseFree	19.32	LIVING	1	1+2
TCGA-AY-A71X-01	54	Female	BLACK OR AFRICAN AMERICAN	Stage I	M0	N0	T2	19.32	DiseaseFree	19.32	LIVING	3	3
TCGA-AH-6903-01	46	Male	WHITE	Stage IIIB	M0	N1b	T3	19.45	DiseaseFree	19.45	LIVING	3	3
TCGA-A6-6781-01	43	Male	WHITE	Stage IIIC	MX	N1b	T4b	19.65	DiseaseFree	19.65	LIVING	1	1+2
TCGA-EI-6507-01	60	Male	WHITE	Stage IIA	M0	N0	T3	19.94	DiseaseFree	19.94	LIVING	1	1+2
TCGA-AA-3562-01	82	Male		Stage IIIC	M0	N2	T3	19.97	DiseaseFree	19.97	LIVING	2	1+2
TCGA-AG-3882-01	66	Female		Stage I	M0	N0	T2	19.97	DiseaseFree	19.97	LIVING	2	1+2
TCGA-AA-3560-01	72	Female		Stage IIIC	M0	N2	T3	19.97	DiseaseFree	19.97	LIVING	2	1+2
TCGA-AG-3609-01	65	Female		Stage IIIC	M0	N2	T3	19.97	DiseaseFree	19.97	LIVING	2	1+2
TCGA-AG-3612-01	55	Female		Stage IIIB	M0	N1	T3	19.97	DiseaseFree	19.97	LIVING	1	1+2
TCGA-AG-3909-01	69	Female		Stage IIIB	M0	N1	T3	19.97	DiseaseFree	19.97	LIVING	2	1+2
TCGA-CM-4744-01	69	Male	WHITE	Stage I	M0	N0	T2	20.01	DiseaseFree	20.01	LIVING	1	1+2
TCGA-AF-6655-01	66	Male	WHITE	Stage IIIA	M0	N1	T2	20.01	DiseaseFree	20.01	LIVING	2	1+2
TCGA-A6-6780-01	74	Male	WHITE	Stage IIA	MX	N0	T3	20.11	DiseaseFree	20.11	LIVING	1	1+2
TCGA-A6-6782-01	82	Male	WHITE	Stage IIB	MX	N0	T4a	20.27	DiseaseFree	20.27	LIVING	1	1+2
TCGA-D5-6530-01	53	Male	WHITE	Stage I	M0	N0	T2	20.4	DiseaseFree	20.4	LIVING	1	1+2
TCGA-EI-6506-01	78	Female	WHITE	Stage IIA	M0	N0	T3	20.53	DiseaseFree	20.53	LIVING	3	3
TCGA-A6-6650-01	69	Female	BLACK OR AFRICAN AMERICAN	Stage IIA	M0	N0	T3	20.6	DiseaseFree	20.6	LIVING	3	3
TCGA-EI-6508-01	48	Female	WHITE	Stage IIIB	M0	N1a	T3	20.89	DiseaseFree	20.89	LIVING	3	3
TCGA-AA-3955-01	38	Male		Stage IIIB	M0	N2a	T2	20.96	DiseaseFree	20.96	LIVING	2	1+2
TCGA-AG-3725-01	90	Female		Stage III	M0	N2	T3	20.96	DiseaseFree	20.96	LIVING	2	1+2
TCGA-AG-A002-01	35	Male		Stage I	M0	N0	T2	20.96	DiseaseFree	20.96	LIVING	3	3
TCGA-AA-3549-01	69	Male		Stage I	M0	N0	T2	20.99	DiseaseFree	20.99	LIVING	2	1+2
TCGA-DC-4745-01	49	Female	WHITE	Stage IIIB	M0	N1a	T3	20.99	DiseaseFree	20.99	LIVING	2	1+2
TCGA-BM-6198-01	73	Male	WHITE	Stage IIIB		N1	T3	21.22	DiseaseFree	21.22	LIVING	1	1+2
TCGA-AD-6548-01	81	Female	WHITE	Stage I	M0	N0	T2	21.35	DiseaseFree	21.35	LIVING	1	1+2
TCGA-AY-6197-01	60	Male	WHITE	Stage IIA		N0	T3	21.42	DiseaseFree	21.42	LIVING	3	3
TCGA-A6-6651-01	55	Female	WHITE	Stage IIIB	MX	N1b	T3	21.75	DiseaseFree	21.75	LIVING	1	1+2
TCGA-QL-A97D-01	84	Female	BLACK OR AFRICAN AMERICAN	Stage I	MX	N0	T2	21.88	DiseaseFree	21.88	LIVING	1	1+2
TCGA-AA-A00Z-01	70	Male		Stage IIA	M0	N0	T3	21.98	DiseaseFree	21.98	LIVING	2	1+2
TCGA-CM-6166-01	48	Female	WHITE	Stage I	M0	N0	T2	21.98	DiseaseFree	21.98	LIVING	2	1+2
TCGA-AA-3968-01	55	Female		Stage I	M0	N0	T2	21.98	DiseaseFree	21.98	LIVING	2	1+2
TCGA-CK-5914-01	81	Male	WHITE	Stage IIIB	MX	N1	T3	21.98	DiseaseFree	21.98	LIVING	1	1+2
TCGA-CM-5344-01	39	Female	WHITE	Stage IIIB	M0	N1b	T3	22.01	DiseaseFree	22.01	LIVING	2	1+2
TCGA-G4-6321-01	60	Female	WHITE	Stage III	MX	N1	T2	22.08	DiseaseFree	22.08	LIVING	3	3
TCGA-A6-6138-01	61	Male	WHITE	Stage I	M0	N0	T2	22.5	DiseaseFree	22.5	LIVING	1	1+2
TCGA-CM-5348-01	72	Male	WHITE	Stage IIIB	M0	N1a	T3	22.96	DiseaseFree	22.96	LIVING	2	1+2
TCGA-AA-3556-01	78	Male		Stage I	M0	N0	T2	23	DiseaseFree	23	LIVING	3	3
TCGA-CM-4743-01	69	Male	WHITE	Stage IIA	M0	N0	T3	23.03	DiseaseFree	23.03	LIVING	1	1+2
TCGA-A6-6654-01	65	Female	WHITE	Stage IIIB	M0	N1	T3	23.85	DiseaseFree	23.85	LIVING	1	1+2
TCGA-AA-3941-01	84	Female		Stage IVA	M1	N1b	T4	23.98	DiseaseFree	23.98	LIVING	2	1+2
TCGA-AA-3979-01	84	Male		Stage IIA	M0	N0	T3	23.98	DiseaseFree	23.98	LIVING	3	3
TCGA-AA-3553-01	61	Female		Stage I	M0	N0	T2	23.98	DiseaseFree	23.98	LIVING	1	1+2
TCGA-AA-3950-01	79	Female		Stage IIA	M0	N0	T3	23.98	DiseaseFree	23.98	LIVING	1	1+2
TCGA-AA-3520-01	86	Female		Stage II	M0	N0	T3	24.01	DiseaseFree	24.01	LIVING	3	3
TCGA-A6-6140-01	62	Male	WHITE	Stage IIA	M0	N0	T3	24.11	DiseaseFree	24.11	LIVING	2	1+2
TCGA-A6-6649-01	66	Male	WHITE	Stage IIIB	M0	N1b	T3	24.15	DiseaseFree	24.15	LIVING	3	3
TCGA-A6-6653-01	82	Male	WHITE	Stage I	M0	N0	T2	24.38	DiseaseFree	24.38	LIVING	3	3
TCGA-AD-6890-01	65	Male	WHITE		MX	N0	T1	24.51	DiseaseFree	24.51	LIVING	2	1+2
TCGA-A6-6652-01	59	Male	BLACK OR AFRICAN AMERICAN	Stage IVA	M1	N0	T3	24.67	DiseaseFree	24.67	LIVING	2	1+2
TCGA-AG-3901-01	67	Female		Stage IIIB	M0	N1	T3	25	DiseaseFree	25	LIVING	1	1+2
TCGA-AA-3977-01	65	Male				N0	T2	25	DiseaseFree	25	LIVING	1	1+2
TCGA-AA-3819-01	41	Female		Stage IIA	M0	N0	T3	25	DiseaseFree	25	LIVING	3	3
TCGA-CM-4747-01	47	Male	WHITE	Stage IVA	M1	N1b	T4a	25	DiseaseFree	25	LIVING	2	1+2
TCGA-DC-4749-01	57	Male	WHITE	Stage I	M0	N0	T2	25.03	DiseaseFree	25.03	LIVING	2	1+2
TCGA-DC-6683-01	43	Male	WHITE	Stage IIIB	M0	N1b	T3	25.03	DiseaseFree	25.03	LIVING	2	1+2
TCGA-DC-6682-01	57	Male	WHITE	Stage IIA	M0	N0	T3	25.03	DiseaseFree	25.03	LIVING	3	3
TCGA-AD-6895-01	84	Male	WHITE	Stage IIIB	M0	N1a	T3	25.07	DiseaseFree	25.07	LIVING	1	1+2
TCGA-D5-6533-01	68	Female	WHITE		M0	N0	T4b	25.46	DiseaseFree	25.46	LIVING	2	1+2
TCGA-DC-6681-01	70	Female	WHITE	Stage IVA	M1	N2a	T3	25.95	DiseaseFree	25.95	LIVING	2	1+2
TCGA-AA-3538-01	54	Female		Stage I	M0	N0	T2	25.99	DiseaseFree	25.99	LIVING	2	1+2
TCGA-AA-3976-01	70	Male		Stage IIIA	M0	N1	T2	25.99	DiseaseFree	25.99	LIVING	2	1+2
TCGA-AA-3949-01	87	Female		Stage IIIB	M0	N1	T3	25.99	DiseaseFree	25.99	LIVING	1	1+2
TCGA-CM-4748-01	53	Male	WHITE	Stage IIIB	M0	N1a	T4a	26.02	DiseaseFree	26.02	LIVING	2	1+2
TCGA-DC-5337-01	69	Male	WHITE	Stage I	M0	N0	T1	26.02	DiseaseFree	26.02	LIVING	3	3
TCGA-G4-6588-01	58	Female	WHITE	Stage IIA	M0	N0	T3	26.15	DiseaseFree	26.15	LIVING	3	3
TCGA-AH-6897-01	48	Male	WHITE	Stage I	M0	N0	T2	26.41	DiseaseFree	26.41	LIVING	2	1+2
TCGA-G4-6320-01	73	Male	WHITE	Stage III	MX	N1	T3	26.41	DiseaseFree	26.41	LIVING	3	3
TCGA-G5-6641-01	67	Male	WHITE	Stage IIIA	MX	N1	T1	26.41	DiseaseFree	26.41	LIVING	3	3
TCGA-AA-3710-01	80	Female		Stage IIA	M0	N0	T3	26.97	DiseaseFree	26.97	LIVING	1	1+2
TCGA-AA-A00O-01	83	Female		Stage IIIC	M0	N2	T3	27	DiseaseFree	27	LIVING	2	1+2
TCGA-CM-4751-01	62	Male	WHITE	Stage IIIB	M0	N1b	T3	27	DiseaseFree	27	LIVING	1	1+2
TCGA-AA-3980-01	89	Female		Stage I	M0	N0	T2	27	DiseaseFree	27	LIVING	3	3
TCGA-AA-3982-01	75	Male		Stage IIIB	M0	N1	T3	27	DiseaseFree	27	LIVING	1	1+2
TCGA-AA-3994-01	69	Male		Stage IIIB	M0	N1	T3	27	DiseaseFree	27	LIVING	2	1+2
TCGA-AU-6004-01	69	Female	WHITE	Stage I	M0	N0	T2	27.07	DiseaseFree	27.07	LIVING	1	1+2
TCGA-A6-6137-01	55	Male	WHITE	Stage IIIB	M0	N1c	T3	27.07	DiseaseFree	27.07	LIVING	3	3
TCGA-AD-6963-01	58	Male	WHITE		MX	N0	T3	27.4	DiseaseFree	27.4	LIVING	1	1+2
TCGA-AH-6644-01	73	Male	WHITE		MX	NX	T3	27.53	DiseaseFree	27.53	LIVING	3	3
TCGA-AA-3532-01	63	Male		Stage IIA	M0	N0	T3	28.98	DiseaseFree	28.98	LIVING	1	1+2
TCGA-AA-3534-01	78	Female		Stage IIA	M0	N0	T3	28.98	DiseaseFree	28.98	LIVING	3	3
TCGA-CM-6164-01	46	Female	WHITE	Stage IIA	M0	N0	T3	29.01	DiseaseFree	29.01	LIVING	1	1+2
TCGA-CM-5341-01	82	Female	WHITE	Stage IIIA	M0	N1a	T2	29.04	DiseaseFree	29.04	LIVING	1	1+2
TCGA-A6-5667-01	40	Female	WHITE	Stage IIIB	MX	N1a	T3	29.14	DiseaseFree	29.14	LIVING	2	1+2
TCGA-A6-5660-01	73	Male	BLACK OR AFRICAN AMERICAN	Stage IIIC	M0	N2b	T3	29.17	DiseaseFree	29.17	LIVING	2	1+2
TCGA-QG-A5YW-01	55	Female	BLACK OR AFRICAN AMERICAN	Stage IIIC	MX	N2b	T3	29.43	DiseaseFree	29.43	LIVING	1	1+2
TCGA-AA-3870-01	71	Female		Stage IV	M1	N2	T3	29.96	DiseaseFree	29.96	LIVING	2	1+2
TCGA-AG-3728-01	73	Male		Stage IIIB	M0	N1	T3	29.96	DiseaseFree	29.96	LIVING	2	1+2
TCGA-AF-4110-01	77	Male	WHITE	Stage IVA	MX	N2b	T4a	29.96	DiseaseFree	29.96	LIVING	1	1+2
TCGA-AA-A00E-01	65	Male		Stage IIA	M0	N0	T3	29.99	DiseaseFree	29.99	LIVING	1	1+2
TCGA-AA-3862-01	82	Male		Stage IIA	M0	N0	T3	30.03	DiseaseFree	30.03	LIVING	1	1+2
TCGA-AA-3861-01	72	Male		Stage IIA	M0	N0	T3	30.03	DiseaseFree	30.03	LIVING	3	3
TCGA-CM-5349-01	68	Female	WHITE	Stage IIA	M0	N0	T3	30.06	DiseaseFree	30.06	LIVING	3	3
TCGA-A6-5659-01	82	Male	WHITE	Stage I	M0	N0	T2	30.42	DiseaseFree	30.42	LIVING	2	1+2
TCGA-DC-5869-01	62	Female	BLACK OR AFRICAN AMERICAN	Stage IIIB	M0	N1a	T3	30.98	DiseaseFree	30.98	LIVING	1	1+2
TCGA-AG-A01N-01	68	Female		Stage IV	M1	N0	T2	30.98	DiseaseFree	30.98	LIVING	2	1+2
TCGA-AA-3877-01	83	Female		Stage I	M0	N0	T1	30.98	DiseaseFree	30.98	LIVING	1	1+2
TCGA-AA-A01I-01	76	Male		Stage I	M0	N0	T2	30.98	DiseaseFree	30.98	LIVING	3	3
TCGA-AA-A01K-01	74	Female		Stage IIIC	M0	N2	T3	30.98	DiseaseFree	30.98	LIVING	2	1+2
TCGA-AA-3860-01	53	Female		Stage IIIB	M0	N1	T3	31.04	DiseaseFree	31.04	LIVING	1	1+2
TCGA-AA-3858-01	67	Male		Stage I	M0	N0	T2	31.04	DiseaseFree	31.04	LIVING	3	3
TCGA-QG-A5Z2-01	61	Male	BLACK OR AFRICAN AMERICAN	Stage I	M0	N0	T2	31.27	DiseaseFree	31.27	LIVING	3	3
TCGA-A6-5657-01	65	Male	BLACK OR AFRICAN AMERICAN	Stage IIIB	M0	N1	T3	31.6	DiseaseFree	31.6	LIVING	2	1+2
TCGA-AG-3902-01	61	Male		Stage IIA	M0	N0	T3	32	DiseaseFree	32	LIVING	1	1+2
TCGA-AG-3578-01	76	Female		Stage IIA	M0	N0	T3	32	DiseaseFree	32	LIVING	3	3
TCGA-AA-A01F-01	72	Male		Stage IIIB	M0	N1	T3	32	DiseaseFree	32	LIVING	2	1+2
TCGA-CM-5860-01	44	Male	WHITE	Stage IIA	M0	N0	T3	32	DiseaseFree	32	LIVING	1	1+2
TCGA-AA-3855-01	72	Male		Stage I	M0	N0	T2	32.03	DiseaseFree	32.03	LIVING	3	3
TCGA-F5-6811-01	72	Female	WHITE	Stage IIA	M0	N0	T3	32.16	DiseaseFree	32.16	LIVING	2	1+2
TCGA-A6-4107-01	57	Female	WHITE	Stage IIIB	M0	N1b	T3	32.42	DiseaseFree	32.42	LIVING	2	1+2
TCGA-A6-3809-01	71	Female	WHITE	Stage IIB	M0	N0	T4	32.72	DiseaseFree	32.72	LIVING	1	1+2
TCGA-A6-5656-01	74	Male	WHITE	Stage I	M0	N0	T2	32.88	DiseaseFree	32.88	LIVING	2	1+2
TCGA-AG-3732-01	78	Female		Stage I	M0	N0	T2	32.95	DiseaseFree	32.95	LIVING	1	1+2
TCGA-QG-A5YX-01	61	Female	BLACK OR AFRICAN AMERICAN	Stage IIA	MX	N0	T3	32.95	DiseaseFree	32.95	LIVING	3	3
TCGA-AY-5543-01	65	Female	BLACK OR AFRICAN AMERICAN	Stage IVA	M1	N1a	T3	32.98	DiseaseFree	32.98	LIVING	1	1+2
TCGA-AA-3947-01	60	Female		Stage IIB	M0	N0	T4	32.98	DiseaseFree	32.98	LIVING	1	1+2
TCGA-AA-3815-01	65	Female		Stage IIA	M0	N0	T3	33.02	DiseaseFree	33.02	LIVING	1	1+2
TCGA-AA-A01T-01	63	Female		Stage III	M0	N1	T3	33.02	DiseaseFree	33.02	LIVING	2	1+2
TCGA-AA-3851-01	74	Male		Stage IIA	M0	N0	T3	33.05	DiseaseFree	33.05	LIVING	3	3
TCGA-A6-3808-01	73	Male	WHITE	Stage IIA	M0	N0	T3	33.31	DiseaseFree	33.31	LIVING	3	3
TCGA-A6-5661-01	80	Female	BLACK OR AFRICAN AMERICAN	Stage IIA	M0	N0	T3	33.51	DiseaseFree	33.51	LIVING	3	3
TCGA-F4-6808-01	54	Female	WHITE	Stage I	M0	N0	T1	33.64	DiseaseFree	33.64	LIVING	2	1+2
TCGA-AA-3548-01	71	Female		Stage IIIC	M0	N2	T3	33.97	DiseaseFree	33.97	LIVING	3	3
TCGA-AG-3592-01	68	Male		Stage IIA	M0	N0	T3	34	DiseaseFree	34	LIVING	2	1+2
TCGA-AG-3593-01	72	Female		Stage IIA	M0	N0	T3	34	DiseaseFree	34	LIVING	2	1+2
TCGA-AA-3956-01	65	Male		Stage IIA	M0	N0	T3	34	DiseaseFree	34	LIVING	3	3
TCGA-AG-3591-01	66	Female		Stage IIA	M0	N0	T3	34	DiseaseFree	34	LIVING	3	3
TCGA-AA-3531-01	75	Female		Stage IIA	M0	N0	T3	34	DiseaseFree	34	LIVING	2	1+2
TCGA-AA-A00F-01	66	Male		Stage IIIC	M0	N2	T3	34	DiseaseFree	34	LIVING	2	1+2
TCGA-AA-3975-01	80	Male		Stage I	M0	N0	T2	34.03	DiseaseFree	34.03	LIVING	2	1+2
TCGA-F4-6805-01	58	Female	WHITE	Stage IIA	M0	N0	T3	34.4	DiseaseFree	34.4	LIVING	1	1+2
TCGA-AF-3400-01	54	Male	WHITE	Stage IIA	M0	N0	T3	34.46	DiseaseFree	34.46	LIVING	1	1+2
TCGA-A6-3807-01	53	Female	WHITE	Stage IIIC	M0	N2	T3	34.63	DiseaseFree	34.63	LIVING	1	1+2
TCGA-AA-A010-01	46	Female		Stage IIB	M0	N0	T4	34.95	DiseaseFree	34.95	LIVING	3	3
TCGA-AG-3893-01	74	Male		Stage IIIB	M0	N1	T3	34.99	DiseaseFree	34.99	LIVING	2	1+2
TCGA-AA-3502-01	73	Male		Stage I	M0	N0	T2	34.99	DiseaseFree	34.99	LIVING	3	3
TCGA-A6-2680-01	72	Female	BLACK OR AFRICAN AMERICAN	Stage II	M0	N0	T3	35.09	DiseaseFree	35.09	LIVING	2	1+2
TCGA-F4-6856-01	45	Male	WHITE	Stage I	M0	N0	T2	35.28	DiseaseFree	35.28	LIVING	3	3
TCGA-F4-6463-01	51	Male	WHITE	Stage IIA	M0	N0	T3	35.71	DiseaseFree	35.71	LIVING	3	3
TCGA-F4-6569-01	60	Male	WHITE	Stage I	M0	N0	T2	35.71	DiseaseFree	35.71	LIVING	1	1+2
TCGA-G4-6586-01	73	Female	WHITE	Stage IIA	M0	N0	T3	35.78	DiseaseFree	35.78	LIVING	1	1+2
TCGA-AA-3524-01	85	Male		Stage II	M0	N0	T3	36.01	DiseaseFree	36.01	LIVING	3	3
TCGA-AG-4001-01	74	Female		Stage IIA	M0	N0	T3	36.01	DiseaseFree	36.01	LIVING	2	1+2
TCGA-AA-3970-01	65	Male		Stage IIA	M0	N0	T3	36.01	DiseaseFree	36.01	LIVING	1	1+2
TCGA-AA-3854-01	71	Female		Stage I	M0	N0	T2	36.01	DiseaseFree	36.01	LIVING	3	3
TCGA-F5-6812-01	67	Male	WHITE	Stage IIA	M0	N0	T3	36.47	DiseaseFree	36.47	LIVING	1	1+2
TCGA-A6-3810-01	62	Male	WHITE	Stage IIA	M0	N0	T3	36.5	DiseaseFree	36.5	LIVING	1	1+2
TCGA-AA-3841-01	66	Male		Stage IIA	M0	N0	T3	36.93	DiseaseFree	36.93	LIVING	2	1+2
TCGA-AG-3731-01	65	Male		Stage IV	M1	N1	T3	36.99	DiseaseFree	36.99	LIVING	1	1+2
TCGA-AG-A011-01	80	Male		Stage IIA	M0	N0	T3	36.99	DiseaseFree	36.99	LIVING	2	1+2
TCGA-CM-4746-01	61	Male	BLACK OR AFRICAN AMERICAN	Stage I	M0	N0	T2	36.99	DiseaseFree	36.99	LIVING	3	3
TCGA-AA-3495-01	79	Male		Stage I	M0	N0	T2	37.02	DiseaseFree	37.02	LIVING	3	3
TCGA-AA-3685-01	69	Male		Stage II	M0	N0	T3	37.02	DiseaseFree	37.02	LIVING	1	1+2
TCGA-AA-3522-01	67	Male		Stage IIA	M0	N0	T3	37.02	DiseaseFree	37.02	LIVING	3	3
TCGA-F5-6814-01	57	Male	WHITE	Stage IIA	M0	N0	T3	37.16	DiseaseFree	37.16	LIVING	1	1+2
TCGA-AF-2693-01	75	Male	WHITE	Stage I	MX	N0	T2	37.94	DiseaseFree	37.94	LIVING	1	1+2
TCGA-AA-A00A-01	80	Male		Stage IIA	M0	N0	T3	38.01	DiseaseFree	38.01	LIVING	1	1+2
TCGA-AA-A00L-01	66	Male		Stage IIA	M0	N0	T3	38.01	DiseaseFree	38.01	LIVING	2	1+2
TCGA-F5-6861-01	60	Female	WHITE	Stage IIA	M0	N0	T3	38.11	DiseaseFree	38.11	LIVING	3	3
TCGA-AH-6544-01	60	Male	WHITE		M1	N1	T3	38.53	DiseaseFree	38.53	LIVING	2	1+2
TCGA-AA-3837-01	67	Male		Stage IIA	M0	N0	T3	38.96	DiseaseFree	38.96	LIVING	3	3
TCGA-G4-6311-01	80	Male	WHITE	Stage III	MX	N1	T3	39.39	DiseaseFree	39.39	LIVING	2	1+2
TCGA-AA-A02F-01	68	Female		Stage IV	M1	N1	T3	39.95	DiseaseFree	39.95	LIVING	2	1+2
TCGA-AA-A02Y-01	73	Male		Stage I	M0	N0	T2	39.95	DiseaseFree	39.95	LIVING	3	3
TCGA-AA-A03J-01	65	Female		Stage I	M0	N0	T2	40.93	DiseaseFree	40.93	LIVING	2	1+2
TCGA-AG-A02X-01	77	Male		Stage I	M0	N0	T2	40.97	DiseaseFree	40.97	LIVING	2	1+2
TCGA-AA-A00Q-01	66	Female		Stage IIIB	M0	N1	T4	41.98	DiseaseFree	41.98	LIVING	1	1+2
TCGA-A6-2678-01	43	Female	WHITE	Stage IIIB	M0	N1	T3	42.25	DiseaseFree	42.25	LIVING	1	1+2
TCGA-QG-A5YV-01	64	Female	BLACK OR AFRICAN AMERICAN	Stage IIIC	MX	N1a	T4b	42.74	DiseaseFree	42.74	LIVING	3	3
TCGA-F4-6807-01	51	Female	WHITE	Stage IIIC	M0	N2b	T3	43	DiseaseFree	43	LIVING	1	1+2
TCGA-AF-2691-01	48	Female	WHITE	Stage I	M0	N0	T1	43	DiseaseFree	43	LIVING	1	1+2
TCGA-D5-6534-01	62	Female	WHITE	Stage IIA	M0	N0	T3	43.23	DiseaseFree	43.23	LIVING	1	1+2
TCGA-A6-2675-01	78	Male	WHITE	Stage IIA	MX	N0	T3	43.4	DiseaseFree	43.4	LIVING	2	1+2
TCGA-DC-6160-01	68	Male	WHITE	Stage I	M0	N0	T2	43.99	DiseaseFree	43.99	LIVING	3	3
TCGA-G4-6306-01	71	Male	WHITE		M0	N0	T2	44.65	DiseaseFree	44.65	LIVING	2	1+2
TCGA-CI-6622-01	74	Male	WHITE	Stage IIB	M0	N0	T4	44.74	DiseaseFree	44.74	LIVING	2	1+2
TCGA-A6-2679-01	73	Female	WHITE	Stage IIB		N0	T3	44.88	DiseaseFree	44.88	LIVING	2	1+2
TCGA-AG-4022-01	59	Female		Stage II	M0	N0	T3	45.99	DiseaseFree	45.99	LIVING	1	1+2
TCGA-A6-2672-01	82	Female	WHITE	Stage IIIB	M0	N1	T3	46.62	DiseaseFree	46.62	LIVING	1	1+2
TCGA-AA-3678-01	60	Female		Stage III	M0	N1	T2	46.98	DiseaseFree	46.98	LIVING	2	1+2
TCGA-AA-3675-01	84	Male		Stage II	M0	N0	T3	47.01	DiseaseFree	47.01	LIVING	3	3
TCGA-F4-6855-01	70	Female	WHITE	Stage IIA	M0	N0	T3	47.37	DiseaseFree	47.37	LIVING	3	3
TCGA-F4-6703-01	64	Male	WHITE	Stage IIA	M0	N0	T3	47.83	DiseaseFree	47.83	LIVING	1	1+2
TCGA-AG-3898-01	61	Male		Stage IIA	M0	N0	T3	48	DiseaseFree	48	LIVING	1	1+2
TCGA-F5-6465-01	64	Female	WHITE	Stage IIA	M0	N0	T3	49.47	DiseaseFree	49.47	LIVING	1	1+2
TCGA-AG-A025-01	62	Female		Stage I	M0	N0	T1	49.93	DiseaseFree	49.93	LIVING	3	3
TCGA-AA-3673-01	53	Female		Stage II	M0	N0	T3	50	DiseaseFree	50	LIVING	3	3
TCGA-AG-3598-01	69	Male		Stage IIA	M0	N0	T3	50	DiseaseFree	50	LIVING	1	1+2
TCGA-CK-5913-01	58	Female	WHITE	Stage IIA	MX	N0	T3	51.28	DiseaseFree	51.28	LIVING	3	3
TCGA-AA-A029-01	67	Male		Stage II	M0	N0	T3	51.94	DiseaseFree	51.94	LIVING	3	3
TCGA-DC-6157-01	48	Male	BLACK OR AFRICAN AMERICAN	Stage I	M0	N0	T2	51.94	DiseaseFree	51.94	LIVING	2	1+2
TCGA-AA-3864-01	71	Male		Stage II	M0	N0	T3	52.96	DiseaseFree	52.96	LIVING	3	3
TCGA-AA-3664-01	74	Female		Stage II	M0	N0	T3	53.98	DiseaseFree	53.98	LIVING	3	3
TCGA-G4-6307-01	37	Female	WHITE	Stage IIIB	M0	N1	T3	54.99	DiseaseFree	54.99	LIVING	2	1+2
TCGA-D5-5541-01	63	Male	WHITE	Stage IIIB	M0	N1a	T3	55.88	DiseaseFree	55.88	LIVING	1	1+2
TCGA-D5-5540-01	73	Male	WHITE	Stage IIA	M0	N0	T3	56.04	DiseaseFree	56.04	LIVING	1	1+2
TCGA-AA-3506-01	77	Male		Stage I	M0	N0	T2	57.98	DiseaseFree	57.98	LIVING	3	3
TCGA-AZ-4315-01	61	Male	WHITE	Stage IIA	M0	N0	T3	58.34	DiseaseFree	58.34	LIVING	1	1+2
TCGA-AA-3655-01	68	Male		Stage II	M0	N0	T3	60.97	DiseaseFree	60.97	LIVING	3	3
TCGA-G4-6315-01	66	Male	WHITE	Stage IV	M1	N1	T3	61.86	DiseaseFree	61.86	LIVING	2	1+2
TCGA-AG-A02N-01	67	Male		Stage II	M0	N0	T3	61.93	DiseaseFree	61.93	LIVING	3	3
TCGA-AA-3509-01	54	Female		Stage II	M0	N0	T3	62.91	DiseaseFree	62.91	LIVING	2	1+2
TCGA-G4-6310-01	69	Male	WHITE	Stage IIIB	M0	N1	T3	63.57	DiseaseFree	63.57	LIVING	2	1+2
TCGA-AA-3510-01	70	Male		Stage II	M0	N0	T3	63.93	DiseaseFree	63.93	LIVING	3	3
TCGA-AF-A56L-01	48	Female	BLACK OR AFRICAN AMERICAN	Stage IIIC	M0	N2	T3	65.93	DiseaseFree	65.93	LIVING	3	3
TCGA-WS-AB45-01	52	Female	BLACK OR AFRICAN AMERICAN	Stage IIA	MX	N0	T3	69.97	DiseaseFree	69.97	LIVING	1	1+2
TCGA-G4-6299-01	69	Male	WHITE	Stage IIIC	M0	N2	T3	74.51	DiseaseFree	74.51	LIVING	1	1+2
TCGA-AZ-4313-01	51	Female	WHITE	Stage I	M0	N0	T1	75.89	DiseaseFree	75.89	LIVING	2	1+2
TCGA-AA-3660-01	51	Female		Stage II	M0	N0	T3	78.02	DiseaseFree	78.02	LIVING	2	1+2
TCGA-CL-5917-01	71	Female	WHITE	Stage IIIC	MX	N2	T3	78.06	DiseaseFree	78.06	LIVING	2	1+2
TCGA-G4-6628-01	78	Male	WHITE	Stage I	M0	N0	T2	79.63	DiseaseFree	79.63	LIVING	1	1+2
TCGA-CK-6747-01	87	Female	WHITE	Stage IIA	MX	N0	T3	82.88	DiseaseFree	82.88	LIVING	3	3
TCGA-AA-3697-01	77	Male		Stage II	M0	N0	T3	84.99	DiseaseFree	84.99	LIVING	2	1+2
TCGA-CK-4950-01	68	Female	BLACK OR AFRICAN AMERICAN	Stage IIIB	M0	N1	T3	85.38	DiseaseFree	85.38	LIVING	3	3
TCGA-AZ-5407-01	51	Female	WHITE	Stage I	M0	N0	T1	88.14	DiseaseFree	88.14	LIVING	3	3
TCGA-DM-A28M-01	63	Male	WHITE	Stage IIA	M0	N0	T3	95.11	DiseaseFree	95.11	LIVING	3	3
TCGA-DM-A28K-01	75	Male	WHITE	Stage IIA	M0	N0	T3	98.16	DiseaseFree	98.16	LIVING	3	3
TCGA-AZ-4308-01	47	Female	WHITE	Stage IIIB	M0	N1	T3	109.2	DiseaseFree	109.2	LIVING	2	1+2
TCGA-AG-A036-01	71	Male		Stage III	M0	N2	T3	117.02	DiseaseFree	117.02	LIVING	3	3
TCGA-DM-A0X9-01	71	Female	WHITE	Stage IIA	M0	N0	T3	119.61	DiseaseFree	119.61	LIVING	3	3
TCGA-DM-A28E-01	72	Female	WHITE	Stage IIA	M0	N0	T3	119.84	DiseaseFree	119.84	LIVING	2	1+2
TCGA-CK-6751-01	88	Female	WHITE	Stage I	MX	N0	T2	124.18	DiseaseFree	124.18	LIVING	3	3
TCGA-DY-A0XA-01	57	Female	WHITE	Stage IIA	M0	N0	T3	126.35	DiseaseFree	126.35	LIVING	2	1+2
TCGA-DM-A1D0-01	79	Female	WHITE	Stage IIA	M0	N0	T3	130.55	DiseaseFree	130.55	LIVING	2	1+2
TCGA-DM-A1HA-01	82	Male	WHITE	Stage IIIC	M0	N2	T3	131.41	DiseaseFree	131.41	LIVING	2	1+2
TCGA-G4-6293-01	49	Female	WHITE	Stage III	M0	N1	T3	133.08	DiseaseFree	133.08	LIVING	1	1+2
TCGA-DM-A1HB-01	75	Male	WHITE	Stage IIIB	M0	N1	T3	135.55	DiseaseFree	135.55	LIVING	3	3
TCGA-DM-A282-01	60	Female	WHITE	Stage IIA	M0	N0	T3	139.06	DiseaseFree	139.06	LIVING	3	3
TCGA-DM-A1D9-01	67	Female	WHITE	Stage IIA	M0	N0	T3	140.28	DiseaseFree	140.28	LIVING	3	3
TCGA-AG-4021-01	84	Female		Stage IV	M1	N2	T3	0	Recurred/Progressed	3.98	DECEASED	2	1+2
TCGA-D5-6537-01	64	Male	WHITE	Stage IIIB	MX	N1a	T3	4.04	Recurred/Progressed	4.8	DECEASED	3	3
TCGA-CM-5862-01	80	Male	WHITE	Stage IVA	M1	N1a	T3	1.02	Recurred/Progressed	5.03	DECEASED	2	1+2
TCGA-AA-3511-01	64	Male		Stage II	M0	N0	T4	1.94	Recurred/Progressed	6.96	LIVING	2	1+2
TCGA-5M-AAT6-01	40	Female	BLACK OR AFRICAN AMERICAN	Stage IV	M1	N2b	T4a	7.19	Recurred/Progressed	9.53	DECEASED	1	1+2
TCGA-NH-A6GA-01	58	Male	BLACK OR AFRICAN AMERICAN	Stage IIIC	MX	N2a	T4a	3.48	Recurred/Progressed	9.92	DECEASED	2	1+2
TCGA-CA-6718-01	46	Male	ASIAN	Stage IIA	M0	N0	T3	6.8	Recurred/Progressed	10.05	DECEASED	1	1+2
TCGA-AD-6964-01	58	Male	WHITE			N2b	T4a	10.68	Recurred/Progressed	10.87	DECEASED	1	1+2
TCGA-AA-A01D-01	47	Female		Stage IIIC	M0	N2	T3	6.01	Recurred/Progressed	10.97	DECEASED	2	1+2
TCGA-NH-A50U-01	42	Male	BLACK OR AFRICAN AMERICAN	Stage IVA	M1	N0	T4a	9.07	Recurred/Progressed	10.97	DECEASED	2	1+2
TCGA-CM-6678-01	63	Female	WHITE	Stage IVA	M1	N1c	T4a	0	Recurred/Progressed	11.01	LIVING	3	3
TCGA-F4-6461-01	41	Female	WHITE	Stage IIIC	M0	N2	T4b	9.46	Recurred/Progressed	11.1	DECEASED	3	3
TCGA-F5-6863-01	71	Female	WHITE	Stage IIIB	M0	N1	T4a	6.27	Recurred/Progressed	11.86	DECEASED	2	1+2
TCGA-T9-A92H-01	82	Male	BLACK OR AFRICAN AMERICAN	Stage IIA	M0	N0	T3	2.66	Recurred/Progressed	11.89	LIVING	2	1+2
TCGA-AA-3552-01	85	Male		Stage IIIC	M0	N2	T3	4.01	Recurred/Progressed	13.01	DECEASED	2	1+2
TCGA-CM-6675-01	35	Male	BLACK OR AFRICAN AMERICAN	Stage IVB	M1	N2b	T3	11.07	Recurred/Progressed	13.04	LIVING	3	3
TCGA-DM-A1D7-01	82	Male	WHITE	Stage IIA	M0	N0	T3	5.06	Recurred/Progressed	13.3	DECEASED	3	3
TCGA-AF-2692-01	54	Female	WHITE	Stage IIA	M0	N0	T3	10.74	Recurred/Progressed	13.53	LIVING	2	1+2
TCGA-EI-6885-01	57	Female	WHITE	Stage IV	M1	N1b	T3	9.69	Recurred/Progressed	13.63	LIVING	1	1+2
TCGA-A6-2682-01	70	Male	WHITE	Stage IV	M1	N1	T4b	12.52	Recurred/Progressed	13.93	DECEASED	2	1+2
TCGA-AA-A02K-01	50	Male		Stage IV	M1	N2	T4	10.05	Recurred/Progressed	13.99	DECEASED	2	1+2
TCGA-DM-A288-01	68	Male	WHITE	Stage IIIC	M0	N2	T3	10.51	Recurred/Progressed	14.03	DECEASED	2	1+2
TCGA-CA-6719-01	77	Male	ASIAN	Stage IIA	M0	N0	T3	11.63	Recurred/Progressed	14.29	LIVING	1	1+2
TCGA-A6-4105-01	79	Male	WHITE	Stage IIA	M0	N0	T3	11.96	Recurred/Progressed	14.52	DECEASED	1	1+2
TCGA-AA-3844-01	78	Female		Stage IIIC	M0	N2	T3	11.99	Recurred/Progressed	14.91	LIVING	2	1+2
TCGA-CM-5861-01	63	Female	WHITE	Stage IIA	M0	N0	T3	11.01	Recurred/Progressed	15.01	LIVING	3	3
TCGA-AD-6888-01	73	Male	WHITE	Stage IIIB	M0	N1b	T3	11.27	Recurred/Progressed	15.51	DECEASED	2	1+2
TCGA-A6-A565-01	34	Female	BLACK OR AFRICAN AMERICAN	Stage IIIC	MX	N2	T3	14.42	Recurred/Progressed	16.23	DECEASED	2	1+2
TCGA-AY-4070-01	50	Female	BLACK OR AFRICAN AMERICAN	Stage IIIC	M0	N2	T3	6.11	Recurred/Progressed	16.29	DECEASED	2	1+2
TCGA-A6-2683-01	57	Female	WHITE	Stage IV	M1	N0	T4	9.86	Recurred/Progressed	16.56	DECEASED	2	1+2
TCGA-EI-6509-01	53	Male	WHITE	Stage IIIC	M0	N2b	T3	2.96	Recurred/Progressed	16.98	LIVING	2	1+2
TCGA-AY-A54L-01	74	Female	BLACK OR AFRICAN AMERICAN	Stage I	M0	N0	T2	13.01	Recurred/Progressed	17.25	LIVING	2	1+2
TCGA-D5-6536-01	73	Male	WHITE	Stage IIA	M0	N0	T3	16.2	Recurred/Progressed	17.84	LIVING	2	1+2
TCGA-G5-6233-01	74	Male	WHITE		M0	N2	T3	3.02	Recurred/Progressed	18.27	DECEASED	3	3
TCGA-AA-3715-01	77	Male		Stage II	M0	N0	T3	5.03	Recurred/Progressed	19.02	DECEASED	1	1+2
TCGA-D5-5539-01	60	Male	WHITE	Stage IIIA	M0	N1	T3	19.02	Recurred/Progressed	19.58	LIVING	2	1+2
TCGA-F5-6813-01	70	Male	WHITE	Stage IIIC	M0	N2	T4a	2.14	Recurred/Progressed	19.65	DECEASED	1	1+2
TCGA-D5-6529-01	69	Male	WHITE	Stage IIA	M0	N0	T3	12.68	Recurred/Progressed	20.17	LIVING	1	1+2
TCGA-CK-5916-01	71	Female	WHITE	Stage I	M0	N0	T1	9.59	Recurred/Progressed	21.12	DECEASED	1	1+2
TCGA-A6-5665-01	84	Female	WHITE	Stage IIA	M0	N0	T3	17.38	Recurred/Progressed	22.04	LIVING	1	1+2
TCGA-A6-5664-01	80	Male	BLACK OR AFRICAN AMERICAN	Stage IIIC	MX	N2a	T4a	21.12	Recurred/Progressed	22.08	LIVING	3	3
TCGA-AD-6901-01	78	Male	WHITE		MX	N0	T3	15.37	Recurred/Progressed	22.4	DECEASED	1	1+2
TCGA-AG-A00Y-01	68	Male		Stage IIA	M0	N0	T3	4.04	Recurred/Progressed	23	LIVING	2	1+2
TCGA-G4-6298-01	90	Male	BLACK OR AFRICAN AMERICAN	Stage IIIB	MX	N1	T4a	9.56	Recurred/Progressed	23.49	DECEASED	2	1+2
TCGA-A6-5662-01	46	Male	WHITE	Stage IVA	M1	N2	T3	21.71	Recurred/Progressed	23.59	LIVING	2	1+2
TCGA-AA-3867-01	74	Male		Stage IV	M1	N2	T3	12.94	Recurred/Progressed	24.01	LIVING	2	1+2
TCGA-AF-6136-01	72	Female	WHITE	Stage IIIB	MX	N1b	T3	20.01	Recurred/Progressed	24.34	LIVING	3	3
TCGA-DM-A0XD-01	65	Male	WHITE	Stage IIA	M0	N0	T3	20.27	Recurred/Progressed	24.41	DECEASED	2	1+2
TCGA-AF-6672-01	43	Male	WHITE	Stage IV	MX	N2b	T4a	15.14	Recurred/Progressed	24.57	LIVING	2	1+2
TCGA-A6-A566-01	55	Female	BLACK OR AFRICAN AMERICAN	Stage IIIB	M0	N1	T4	8.44	Recurred/Progressed	24.9	DECEASED	2	1+2
TCGA-A6-6142-01	56	Female	WHITE	Stage IVA	M1	N1a	T3	21.48	Recurred/Progressed	25.07	LIVING	2	1+2
TCGA-A6-6648-01	56	Male	WHITE	Stage IVA	M1	N0	T3	22.54	Recurred/Progressed	25.16	LIVING	3	3
TCGA-AG-A00H-01	75	Male		Stage IIA	M0	N0	T3	25.95	Recurred/Progressed	25.95	LIVING	2	1+2
TCGA-AA-A01X-01	80	Female		Stage III	M0	N1	T2	25.99	Recurred/Progressed	25.99	LIVING	2	1+2
TCGA-G4-6322-01	65	Male	WHITE	Stage IIIB	MX	N1	T3	25.92	Recurred/Progressed	26.02	LIVING	3	3
TCGA-AD-6965-01	62	Male	WHITE	Stage IIIC	M0	N2b	T4a	21.29	Recurred/Progressed	26.45	LIVING	2	1+2
TCGA-AG-3999-01	61	Female		Stage IIIC	M0	N2	T3	25.99	Recurred/Progressed	28.02	LIVING	2	1+2
TCGA-G4-6294-01	75	Male	WHITE	Stage IV	M1	N1	T3	16.98	Recurred/Progressed	28.19	DECEASED	2	1+2
TCGA-F5-6702-01	71	Male	WHITE	Stage IVA	M1	N1	T3	12.09	Recurred/Progressed	28.55	DECEASED	1	1+2
TCGA-AA-3555-01	81	Female		Stage IIA	M0	N0	T3	2.99	Recurred/Progressed	29.93	LIVING	3	3
TCGA-DC-6156-01	62	Male	WHITE	Stage IVA	M1	N2b	T4a	0.99	Recurred/Progressed	30.98	LIVING	1	1+2
TCGA-F4-6460-01	51	Female	WHITE	Stage IIIB	M0	N1	T3	10.28	Recurred/Progressed	31.93	DECEASED	2	1+2
TCGA-A6-5666-01	78	Male	WHITE	Stage IIC	M0	N0	T4b	31.87	Recurred/Progressed	32.69	LIVING	3	3
TCGA-AZ-4615-01	84	Male	WHITE	Stage IIIB	M0	N1	T3	22.6	Recurred/Progressed	32.92	LIVING	1	1+2
TCGA-CI-6620-01	41	Female	WHITE	Stage IVA	M1	N1	T3	2.96	Recurred/Progressed	33.15	LIVING	2	1+2
TCGA-AA-A01R-01	47	Male		Stage III	M0	N2	T3	19.97	Recurred/Progressed	34.99	LIVING	1	1+2
TCGA-AA-3812-01	82	Female		Stage IIA	M0	N0	T3	25.03	Recurred/Progressed	35.02	LIVING	2	1+2
TCGA-G4-6314-01	76	Female	WHITE	Stage IV	M1	N2	T3	19.88	Recurred/Progressed	35.91	LIVING	2	1+2
TCGA-G4-6317-01	51	Female	WHITE	Stage IIIC	MX	N2	T3	19.45	Recurred/Progressed	35.97	LIVING	2	1+2
TCGA-G4-6317-02	51	Female	WHITE	Stage IIIC	MX	N2	T3	19.45	Recurred/Progressed	35.97	LIVING	2	1+2
TCGA-AA-3692-01	47	Female		Stage IV	M1	N2	T3	13.01	Recurred/Progressed	35.97	DECEASED	3	3
TCGA-AG-A015-01	64	Female		Stage I	M0	N0	T1	17.02	Recurred/Progressed	36.01	LIVING	3	3
TCGA-AG-3887-01	68	Male		Stage IIA	M0	N0	T3	34.95	Recurred/Progressed	36.93	LIVING	3	3
TCGA-AA-A01Z-01	68	Male		Stage II	M0	N0	T3	36.99	Recurred/Progressed	36.99	LIVING	2	1+2
TCGA-AA-3842-01	51	Male		Stage IIIA	M0	N1	T2	13.01	Recurred/Progressed	36.99	LIVING	2	1+2
TCGA-A6-2684-01	75	Female	WHITE	Stage I	M0	N0	T2	32.06	Recurred/Progressed	37.02	LIVING	2	1+2
TCGA-A6-2685-01	48	Female	BLACK OR AFRICAN AMERICAN	Stage IIA	M0	N0	T3	31.14	Recurred/Progressed	37.22	LIVING	2	1+2
TCGA-AF-3911-01	48	Male	WHITE	Stage IIIC	MX	N2	T3	33.51	Recurred/Progressed	37.71	LIVING	2	1+2
TCGA-AG-A032-01	68	Male		Stage IIIB	M0	N1	T3	26.02	Recurred/Progressed	38.01	LIVING	2	1+2
TCGA-AA-A01P-01	80	Female		Stage III	M0	N1	T3	25.03	Recurred/Progressed	38.04	DECEASED	1	1+2
TCGA-RU-A8FL-01	51	Male	BLACK OR AFRICAN AMERICAN	Stage IIIB	MX	N2a	T3	8.41	Recurred/Progressed	38.67	LIVING	2	1+2
TCGA-AG-A02G-01	66	Male		Stage IV	M1	N1	T2	18.99	Recurred/Progressed	38.93	DECEASED	2	1+2
TCGA-AA-3517-01	60	Male		Stage IIA	M0	N0	T3	26.97	Recurred/Progressed	38.96	LIVING	2	1+2
TCGA-5M-AATE-01	76	Male	BLACK OR AFRICAN AMERICAN	Stage IIA	M0	N0	T3	26.61	Recurred/Progressed	39.42	LIVING	2	1+2
TCGA-AA-A02W-01	73	Female		Stage I	M0	N0	T2	33.02	Recurred/Progressed	40.97	LIVING	2	1+2
TCGA-DY-A1DC-01	72	Female	WHITE	Stage IIA	M0	N0	T3	20.7	Recurred/Progressed	41.33	DECEASED	2	1+2
TCGA-F4-6806-01	59	Female	WHITE	Stage I	M0	N0	T2	37.19	Recurred/Progressed	41.39	LIVING	3	3
TCGA-F5-6571-01	62	Female	WHITE	Stage IIA	M0	N0	T3	34.79	Recurred/Progressed	42.31	LIVING	1	1+2
TCGA-AH-6643-01	50	Male	WHITE	Stage IIIC	M0	N2b	T3	33.71	Recurred/Progressed	43.17	DECEASED	2	1+2
TCGA-A6-2674-01	71	Male	WHITE	Stage IV	M1	N2	T3	40.05	Recurred/Progressed	43.73	LIVING	1	1+2
TCGA-A6-2671-01	85	Male	WHITE	Stage IV	M1	N2	T3	39.91	Recurred/Progressed	43.73	DECEASED	2	1+2
TCGA-D5-5537-01	83	Male	WHITE		MX	N2	T3	23.72	Recurred/Progressed	45.37	DECEASED	3	3
TCGA-A6-2681-01	73	Female	WHITE	Stage IIA	M0	N0	T3	37.78	Recurred/Progressed	45.57	LIVING	2	1+2
TCGA-AG-3587-01	65	Male		Stage I	M0	N0	T2	39.95	Recurred/Progressed	45.99	LIVING	2	1+2
TCGA-AA-3972-01	72	Male		Stage IV	M1	N1	T3	39.95	Recurred/Progressed	50.95	LIVING	2	1+2
TCGA-DY-A1DG-01	75	Male	WHITE	Stage IVA	M1	N1	T3	19.45	Recurred/Progressed	51.45	DECEASED	2	1+2
TCGA-AG-A023-01	62	Female		Stage IV	M1	N2	T4	27	Recurred/Progressed	51.94	DECEASED	2	1+2
TCGA-G4-6304-01	66	Female	WHITE	Stage IIB	M0	N0	T4	28.22	Recurred/Progressed	53.58	LIVING	1	1+2
TCGA-D5-5538-01	60	Female	WHITE	Stage IIIB	M0	N1b	T3	33.08	Recurred/Progressed	54.57	DECEASED	1	1+2
TCGA-G5-6235-01	72	Male	WHITE	Stage IIIB	MX	N1	T3	34.23	Recurred/Progressed	55.72	LIVING	3	3
TCGA-A6-A56B-01	57	Male	BLACK OR AFRICAN AMERICAN	Stage IIIB	M0	N1	T3	55.12	Recurred/Progressed	56.21	DECEASED	2	1+2
TCGA-SS-A7HO-01	44	Female	BLACK OR AFRICAN AMERICAN	Stage IIB	M0	N0	T4a	59.17	Recurred/Progressed	60.09	LIVING	2	1+2
TCGA-A6-A567-01	56	Male	BLACK OR AFRICAN AMERICAN	Stage IV	M1	N1	T3	35.12	Recurred/Progressed	61.79	DECEASED	2	1+2
TCGA-AZ-5403-01	43	Male	WHITE	Stage II	MX	N0	T3	9.99	Recurred/Progressed	62.75	DECEASED	2	1+2
TCGA-AZ-4684-01	49	Male	WHITE	Stage IVA	M1	N2	T3	13.5	Recurred/Progressed	64.95	LIVING	2	1+2
TCGA-G4-6303-01	54	Female	WHITE	Stage IV	M1	N1	T3	28.65	Recurred/Progressed	65.8	DECEASED	2	1+2
TCGA-CK-4951-01	79	Female	WHITE	Stage IIA	M0	N0	T3	15.77	Recurred/Progressed	70.11	DECEASED	1	1+2
TCGA-G4-6627-01	84	Male	WHITE	Stage IIA	M0	N0	T3	32.95	Recurred/Progressed	74.74	LIVING	1	1+2
TCGA-DM-A28C-01	74	Male	WHITE	Stage IIA	M0	N0	T3	63.37	Recurred/Progressed	81.31	DECEASED	3	3
TCGA-G4-6297-01	55	Female	WHITE	Stage IV	M1	N2	T3	78.65	Recurred/Progressed	82.33	LIVING	1	1+2
TCGA-AD-6889-01	76	Male	ASIAN	Stage IIA	M0	N0	T3	49.8	Recurred/Progressed	83.18	DECEASED	3	3
TCGA-G4-6309-01	40	Female	BLACK OR AFRICAN AMERICAN	Stage IIIB	M0	N1	T3	71.48	Recurred/Progressed	85.41	LIVING	3	3
TCGA-AF-A56K-01	56	Male	BLACK OR AFRICAN AMERICAN	Stage IIA	M0	N0	T3	39.98	Recurred/Progressed	86.56	LIVING	2	1+2
TCGA-G4-6625-01	77	Female	WHITE	Stage IIA	M0	N0	T3	84.23	Recurred/Progressed	91.72	LIVING	1	1+2
TCGA-DM-A1D4-01	80	Male	WHITE	Stage IIA	M0	N0	T3	63.07	Recurred/Progressed	92.67	DECEASED	3	3
TCGA-AZ-6601-01	68	Male	WHITE	Stage II	M0	N0	T3	74.57	Recurred/Progressed	99.93	DECEASED	1	1+2
TCGA-DM-A28H-01	50	Male	WHITE	Stage IIIC	M0	N2	T3	15.9	Recurred/Progressed	116.98	LIVING	2	1+2
TCGA-DY-A1DE-01	56	Female	WHITE	Stage IIA	M0	N0	T3	108.94	Recurred/Progressed	129.17	LIVING	3	3
TCGA-AA-3850-01	74	Male		Stage I	M0	N0	T2	NA		0	DECEASED	3	3
TCGA-AA-3852-01	88	Male		Stage IIA	M0	N0	T3	NA		0	DECEASED	3	3
TCGA-AA-3845-01	86	Female		Stage IIA	M0	N0	T3	NA		0	DECEASED	1	1+2
TCGA-AA-3529-01	78	Female		Stage IIIC	M0	N2	T3	NA		0	DECEASED	2	1+2
TCGA-AY-4071-01	63	Female	WHITE	Stage I		N0	T1	NA		0.95	DECEASED	1	1+2
TCGA-AA-3818-01	78	Female		Stage IIA	M0	N0	T3	NA		0.99	DECEASED	3	3
TCGA-AZ-4323-01	37	Male	WHITE	Stage IV	M1	N2	T4	NA		1.41	DECEASED	1	1+2
TCGA-5M-AAT4-01	74	Male	BLACK OR AFRICAN AMERICAN	Stage IV	M1	N0	T3	NA		1.61	DECEASED	2	1+2
TCGA-AZ-6608-01	55	Female	WHITE	Stage IIIA	M0	N1	T2	NA		1.94	DECEASED	2	1+2
TCGA-AG-A026-01	66	Male		Stage II	M0	N0	T4	NA		1.94	DECEASED	2	1+2
TCGA-AA-3666-01	68	Male		Stage III	M0	N1	T3	NA		2	DECEASED	1	1+2
TCGA-AA-3930-01	66	Male		Stage IV	M1	N2	T3	NA		2	DECEASED	2	1+2
TCGA-AA-3952-01	68	Male		Stage IIIC	M0	N2	T3	NA		2	DECEASED	2	1+2
TCGA-AG-3594-01	77	Male		Stage IIA	M0	N0	T3	NA		2	DECEASED	1	1+2
TCGA-AA-A02H-01	74	Female		Stage IV	M1	N2	T3	NA		2	DECEASED	2	1+2
TCGA-AH-6547-01	79	Female	WHITE		MX	N0	T3	NA		2.5	DECEASED	1	1+2
TCGA-AA-A02E-01	82	Female		Stage IV	M1	N1	T3	NA		2.96	DECEASED	2	1+2
TCGA-AA-3492-01	90	Female		Stage II	M0	N0	T3	NA		3.02	DECEASED	1	1+2
TCGA-AZ-6607-01	69	Male	WHITE	Stage IV	M1	N2	T4	NA		3.19	DECEASED	1	1+2
TCGA-AA-A00N-01	75	Male		Stage IIB	M0	N0	T4	NA		4.01	DECEASED	3	3
TCGA-AA-3696-01	75	Female		Stage IV	M1	N1	T3	NA		5.03	DECEASED	2	1+2
TCGA-AA-3488-01	58	Male		Stage IV	M1	N2	T3	NA		5.03	DECEASED	2	1+2
TCGA-AA-A02J-01	70	Female		Stage IV	M1	N0	T3	NA		5.03	DECEASED	2	1+2
TCGA-AZ-4616-01	82	Female	WHITE	Stage IV	M1	N2	T3	NA		5.12	DECEASED	1	1+2
TCGA-AZ-6605-01	77	Male	WHITE	Stage IIIB	M0	N1	T4	NA		5.22	DECEASED	1	1+2
TCGA-AZ-4614-01	71	Female	WHITE	Stage IVA	M1	N1	T4a	NA		5.65	DECEASED	2	1+2
TCGA-AD-6899-01	84	Male	WHITE	Stage IIIC	MX	N2b	T4a	NA		5.78	DECEASED	1	1+2
TCGA-DM-A285-01	71	Female	WHITE	Stage IV	M1	N2	T3	NA		5.88	DECEASED	2	1+2
TCGA-F4-6570-01	78	Female	WHITE	Stage IIA	M0	N0	T3	NA		6.18	DECEASED	1	1+2
TCGA-AZ-6599-01	72	Male	WHITE	Stage I	MX	N0	T2	NA		6.77	DECEASED	2	1+2
TCGA-AA-3489-01	75	Male		Stage II	M0	N0	T3	NA		7.03	DECEASED	1	1+2
TCGA-DM-A1DA-01	71	Female	WHITE	Stage IIIC	M0	N2	T3	NA		7.49	DECEASED	3	3
TCGA-DM-A280-01	70	Female	WHITE	Stage IIA	M0	N0	T3	NA		7.75	DECEASED	3	3
TCGA-AA-3989-01	84	Male		Stage IV	M1	N2	T3	NA		7.95	DECEASED	1	1+2
TCGA-QG-A5Z1-01	71	Male	BLACK OR AFRICAN AMERICAN	Stage IIIB	MX	N1b	T3	NA		8.41	DECEASED	2	1+2
TCGA-F4-6459-01	61	Female	WHITE	Stage IIIB	M0	N2a	T3	NA		8.61	DECEASED	2	1+2
TCGA-F5-6464-01	77	Female	WHITE	Stage IIIC	M0	N2a	T4b	NA		9.95	DECEASED	1	1+2
TCGA-AA-3848-01	82	Female		Stage IIIC	M0	N2	T3	NA		10.05	DECEASED	2	1+2
TCGA-AA-3811-01	84	Female		Stage III	M0	N2	T3	NA		10.05	DECEASED	1	1+2
TCGA-AF-3913-01	60	Male	BLACK OR AFRICAN AMERICAN	Stage IV	M1	N1	T3	NA		10.38	DECEASED	2	1+2
TCGA-DC-6158-01	70	Male	WHITE	Stage I	M0	N0	T2	NA		10.97	DECEASED	1	1+2
TCGA-AA-3680-01	67	Female		Stage IV	M1	N2	T4	NA		11.01	DECEASED	3	3
TCGA-AZ-6606-01	81	Male	WHITE	Stage IV	M1	N2	T4	NA		11.73	DECEASED	3	3
TCGA-AZ-6600-01	64	Male	BLACK OR AFRICAN AMERICAN	Stage IV	M1	N1	T4	NA		12.09	DECEASED	2	1+2
TCGA-DM-A1D8-01	50	Female	WHITE			N1	T3	NA		12.58	DECEASED	3	3
TCGA-AA-3516-01	74	Female		Stage III	M0	N2	T3	NA		13.01	DECEASED	1	1+2
TCGA-F4-6809-01	52	Female	WHITE	Stage IVA	M1	N1	T3	NA		13.24	DECEASED	1	1+2
TCGA-NH-A8F8-01	79	Male	BLACK OR AFRICAN AMERICAN	Stage IV	M1	N2b	T4a	NA		16.79	DECEASED	2	1+2
TCGA-AF-5654-01	73	Female	WHITE	Stage I	M0	N0	T2	NA		16.82	DECEASED	2	1+2
TCGA-AF-2690-01	76	Female	WHITE	Stage IIIC	M0	N2	T3	NA		17.21	DECEASED	1	1+2
TCGA-AA-A03F-01	90	Female		Stage III	M0	N2	T3	NA		18.04	DECEASED	2	1+2
TCGA-AG-3583-01	66	Male		Stage IV	M1	N2	T3	NA		20.04	DECEASED	3	3
TCGA-AA-A02R-01	84	Female		Stage IIA	M0	N0	T3	NA		22.01	DECEASED	1	1+2
TCGA-AG-3584-01	60	Male		Stage IV	M1	N2	T3	NA		23.98	DECEASED	2	1+2
TCGA-DY-A1DF-01	73	Female	WHITE	Stage IIIC	M0	N2	T3	NA		24.11	DECEASED	2	1+2
TCGA-A6-2677-01	68	Female	WHITE	Stage IIIC	M0	N2	T3	NA		24.31	DECEASED	2	1+2
TCGA-DM-A28A-01	78	Male	WHITE	Stage IIIC	M0	N2	T3	NA		26.45	DECEASED	2	1+2
TCGA-AA-3869-01	76	Male		Stage IV	M1	N2	T4	NA		27	DECEASED	1	1+2
TCGA-AZ-6603-01	77	Female	WHITE		MX	N1	T2	NA		29.53	DECEASED	1	1+2
TCGA-DY-A1H8-01	77	Female	WHITE	Stage IIIA	M0	N1	T2	NA		32.59	DECEASED	2	1+2
TCGA-DM-A28F-01	73	Male	WHITE	Stage IIIB	M0	N1	T3	NA		35.94	DECEASED	2	1+2
TCGA-AG-3574-01	89	Female		Stage II	M0	N0	T3	NA		36.01	DECEASED	3	3
TCGA-AG-3582-01	75	Male		Stage IV	M1	N1	T3	NA		36.01	DECEASED	2	1+2
TCGA-A6-2686-01	81	Female	WHITE	Stage IIA	M0	N0	T3	NA		36.99	DECEASED	1	1+2
TCGA-DM-A0XF-01	68	Female	WHITE	Stage IIIC	M0	N2	T3	NA		38.17	DECEASED	1	1+2
TCGA-AA-A024-01	81	Male		Stage II	M0	N0	T3	NA		39.03	DECEASED	3	3
TCGA-A6-2676-01	75	Female	WHITE	Stage IIB	M0	N0	T4	NA		42.87	DECEASED	1	1+2
TCGA-DM-A1DB-01	68	Male	WHITE	Stage IIA	M0	N0	T3	NA		44.28	DECEASED	3	3
TCGA-G4-6626-01	90	Male	WHITE	Stage IIA	M0	N0	T3	NA		46.71	DECEASED	2	1+2
TCGA-G5-6572-01	56	Male	WHITE					NA		47.04	DECEASED	2	1+2
TCGA-G5-6572-02	56	Male	WHITE					NA		47.04	DECEASED	1	1+2
TCGA-CK-5912-01	81	Male	WHITE	Stage I	MX	N0	T2	NA		49.05	DECEASED	2	1+2
TCGA-AZ-6598-01	77	Female	WHITE	Stage II	MX	N0	T3	NA		49.38	DECEASED	1	1+2
TCGA-DM-A1D6-01	88	Male	WHITE	Stage IIA	M0	N0	T3	NA		49.87	DECEASED	3	3
TCGA-DY-A1DD-01	77	Female	WHITE	Stage IIIB	M0	N1	T3	NA		57.19	DECEASED	2	1+2
TCGA-DM-A28G-01	75	Male	WHITE	Stage IIA	M0	N0	T3	NA		60.74	DECEASED	3	3
TCGA-G4-6302-01	90	Female	WHITE	Stage IIA	M0	N0	T3	NA		67.25	DECEASED	1	1+2
