# Supplementary material for: Epithelial-Mesenchymal Transformation Related Genomic Analysis Reveals Prognostic And Immunogenic Significance In Colorectal Cancer
Source: Research Square preprint supplement (doi:10.21203/rs.3.rs-903298/v1), 2021-09-30
Supplement: Supplementary file 2 [file c2cf5d14b63326d6550fe230.xlsx]

## Sheet: Sheet1
RGCC		From	To	Species	Gene Name
LY6G6C		GFI1	2672	Homo sapiens	growth factor independent 1 transcriptional repressor(GFI1)
SPERT		UXS1	80146	Homo sapiens	UDP-glucuronate decarboxylase 1(UXS1)
C6orf25		UBE2L6	9246	Homo sapiens	ubiquitin conjugating enzyme E2 L6(UBE2L6)
LAP3		GPATCH3	63906	Homo sapiens	G-patch domain containing 3(GPATCH3)
RP11-559N14.5		SLA2	84174	Homo sapiens	Src like adaptor 2(SLA2)
USP30-AS1		NUDT6	11162	Homo sapiens	nudix hydrolase 6(NUDT6)
AL133493.2		NUBP1	4682	Homo sapiens	nucleotide binding protein 1(NUBP1)
RP13-455A7.1		CCAR2	57805	Homo sapiens	cell cycle and apoptosis regulator 2(CCAR2)
C12orf56		MIR4666B	100847047	Homo sapiens	microRNA 4666b(MIR4666B)
CXCL10		AQP1	358	Homo sapiens	aquaporin 1 (Colton blood group)(AQP1)
IRF1		TRBC2	28638	Homo sapiens	T cell receptor beta constant 2(TRBC2)
CXCL9		IGLON5	402665	Homo sapiens	IgLON family member 5(IGLON5)
C6orf15		KAT8	84148	Homo sapiens	lysine acetyltransferase 8(KAT8)
STX18		SUPT20H	55578	Homo sapiens	SPT20 homolog, SAGA complex component(SUPT20H)
TYMS		TRMT44	152992	Homo sapiens	tRNA methyltransferase 44 homolog (S. cerevisiae)(TRMT44)
XXbac-BPG32J3.20		SCML2P2	100421172	Homo sapiens	SCML2 pseudogene 2(SCML2P2)
AC016831.5		GBP5	115362	Homo sapiens	guanylate binding protein 5(GBP5)
TRIM69		IGFL1P1	727703	Homo sapiens	IGF like family member 1 pseudogene 1(IGFL1P1)
ATP5A1		ZNF663P	100130934	Homo sapiens	zinc finger protein 663, pseudogene(ZNF663P)
CXCR6		BCAM	4059	Homo sapiens	basal cell adhesion molecule (Lutheran blood group)(BCAM)
C2CD4A		BIN3	55909	Homo sapiens	bridging integrator 3(BIN3)
DHRS12		LINC00407	106144541	Homo sapiens	long intergenic non-protein coding RNA 407(LINC00407)
POU6F2		SCO2	9997	Homo sapiens	SCO2, cytochrome c oxidase assembly protein(SCO2)
LINC00087		PSME1	5720	Homo sapiens	proteasome activator subunit 1(PSME1)
WARS		PSME2	5721	Homo sapiens	proteasome activator subunit 2(PSME2)
HDAC5		PRR15	222171	Homo sapiens	proline rich 15(PRR15)
AC018641.7		ASPHD2	57168	Homo sapiens	aspartate beta-hydroxylase domain containing 2(ASPHD2)
RP11-66B24.7		WFDC10B	280664	Homo sapiens	WAP four-disulfide core domain 10B(WFDC10B)
CIITA		LAP3	51056	Homo sapiens	leucine aminopeptidase 3(LAP3)
LY6G6E		RNU6-411P	106479747	Homo sapiens	RNA, U6 small nuclear 411, pseudogene(RNU6-411P)
RNU6-438P		IDO1	3620	Homo sapiens	indoleamine 2,3-dioxygenase 1(IDO1)
PLAG1		GRID2IP	392862	Homo sapiens	Grid2 interacting protein(GRID2IP)
UPK2		SAPCD1-AS1	104413891	Homo sapiens	SAPCD1 antisense RNA 1(SAPCD1-AS1)
AC006262.5		BEX4	56271	Homo sapiens	brain expressed X-linked 4(BEX4)
ZNF663P		BEX2	84707	Homo sapiens	brain expressed X-linked 2(BEX2)
GSR		DUXAP8	503637	Homo sapiens	double homeobox A pseudogene 8(DUXAP8)
FECH		CDCA2	157313	Homo sapiens	cell division cycle associated 2(CDCA2)
GNG4		EPHA10	284656	Homo sapiens	EPH receptor A10(EPHA10)
APOL6		TPTE2P1	646405	Homo sapiens	transmembrane phosphoinositide 3-phosphatase and tensin homolog 2 pseudogene 1(TPTE2P1)
CTB-92J24.3		IL20RB	53833	Homo sapiens	interleukin 20 receptor subunit beta(IL20RB)
LAMP5		C2CD4A	145741	Homo sapiens	C2 calcium dependent domain containing 4A(C2CD4A)
RDH12		IGSF9	57549	Homo sapiens	immunoglobulin superfamily member 9(IGSF9)
ASPHD2		TMTC4	84899	Homo sapiens	transmembrane and tetratricopeptide repeat containing 4(TMTC4)
CASP1		C12ORF56	115749	Homo sapiens	chromosome 12 open reading frame 56(C12orf56)
CD74		OR2I1P	442197	Homo sapiens	olfactory receptor family 2 subfamily I member 1 pseudogene(OR2I1P)
APOL3		RDH12	145226	Homo sapiens	retinol dehydrogenase 12 (all-trans/9-cis/11-cis)(RDH12)
GZMA		ERI1	90459	Homo sapiens	exoribonuclease 1(ERI1)
GFI1		EPB41L1	2036	Homo sapiens	erythrocyte membrane protein band 4.1 like 1(EPB41L1)
ZNF334		RNU6-438P	106479760	Homo sapiens	RNA, U6 small nuclear 438, pseudogene(RNU6-438P)
CD3D		GOLGA8IP	283796	Homo sapiens	golgin A8 family member I, pseudogene(GOLGA8IP)
GRID2IP		RRS1	23212	Homo sapiens	ribosome biogenesis regulator homolog(RRS1)
SLC28A3		SLAMF7	57823	Homo sapiens	SLAM family member 7(SLAMF7)
GNLY		ICOS	29851	Homo sapiens	inducible T-cell costimulator(ICOS)
IDO1		CEP76	79959	Homo sapiens	centrosomal protein 76(CEP76)
CFHR4		DUX4L27	100131369	Homo sapiens	double homeobox 4 like 27(DUX4L27)
ERI1		DNAH17	8632	Homo sapiens	dynein axonemal heavy chain 17(DNAH17)
SLC18B1		POU6F2	11281	Homo sapiens	POU class 6 homeobox 2(POU6F2)
PROSER2		ZNF34	80778	Homo sapiens	zinc finger protein 34(ZNF34)
IGFL1P1		NR1D1	9572	Homo sapiens	nuclear receptor subfamily 1 group D member 1(NR1D1)
IGLON5		BRI3BP	140707	Homo sapiens	BRI3 binding protein(BRI3BP)
TNFRSF11A		TYMSOS	494514	Homo sapiens	TYMS opposite strand(TYMSOS)
EPB41L1		KCNK15-AS1	106144538	Homo sapiens	KCNK15 antisense RNA 1 (head to head)(KCNK15-AS1)
MGAT4EP		RNF225	646862	Homo sapiens	ring finger protein 225(RNF225)
RP5-1061H20.4		KLHDC8A	55220	Homo sapiens	kelch domain containing 8A(KLHDC8A)
TRMT44		INTS9	55756	Homo sapiens	integrator complex subunit 9(INTS9)
RP1-241P17.1		RGL2	5863	Homo sapiens	ral guanine nucleotide dissociation stimulator like 2(RGL2)
RP11-65J21.3		HLA-DRB1	3123	Homo sapiens	major histocompatibility complex, class II, DR beta 1(HLA-DRB1)
C11orf63		HOTAIR	100124700	Homo sapiens	HOX transcript antisense RNA(HOTAIR)
PAN3-AS1		DHRS12	79758	Homo sapiens	dehydrogenase/reductase 12(DHRS12)
LINC01425		GDI1	2664	Homo sapiens	GDP dissociation inhibitor 1(GDI1)
CXCL11		CAB39L	81617	Homo sapiens	calcium binding protein 39 like(CAB39L)
RARRES3		SPIN3	169981	Homo sapiens	spindlin family member 3(SPIN3)
RP5-968J1.1		INTS10	55174	Homo sapiens	integrator complex subunit 10(INTS10)
UBD		CD3G	917	Homo sapiens	CD3g molecule(CD3G)
KCNK15-AS1		CTSW	1521	Homo sapiens	cathepsin W(CTSW)
APOL2		PTH1R	5745	Homo sapiens	parathyroid hormone 1 receptor(PTH1R)
PSME2		CD3D	915	Homo sapiens	CD3d molecule(CD3D)
GBP4		GNGT1	2792	Homo sapiens	G protein subunit gamma transducin 1(GNGT1)
KAT8		HSD3BP5	391081	Homo sapiens	hydroxy-delta-5-steroid dehydrogenase, 3 beta, pseudogene 5(HSD3BP5)
GBP1		GNLY	10578	Homo sapiens	granulysin(GNLY)
CUX1		PBK	55872	Homo sapiens	PDZ binding kinase(PBK)
AC092580.4		CTLA4	1493	Homo sapiens	cytotoxic T-lymphocyte associated protein 4(CTLA4)
HSD3BP5		ANXA9	8416	Homo sapiens	annexin A9(ANXA9)
PAN3		LINC00973	100506377	Homo sapiens	long intergenic non-protein coding RNA 973(LINC00973)
MPZ		PARP3	10039	Homo sapiens	poly(ADP-ribose) polymerase family member 3(PARP3)
BCAM		C5ORF56	441108	Homo sapiens	chromosome 5 open reading frame 56(C5orf56)
CTA-384D8.35		WARS	7453	Homo sapiens	tryptophanyl-tRNA synthetase(WARS)
FOXA1		IL15	3600	Homo sapiens	interleukin 15(IL15)
SYT7		TNNC1	7134	Homo sapiens	troponin C1, slow skeletal and cardiac type(TNNC1)
CTD-2547L24.3		TSC22D3	1831	Homo sapiens	TSC22 domain family member 3(TSC22D3)
RP11-452L6.6		TACR3	6870	Homo sapiens	tachykinin receptor 3(TACR3)
CD2		BTN3A3	10384	Homo sapiens	butyrophilin subfamily 3 member A3(BTN3A3)
RGL2		TIMM21	29090	Homo sapiens	translocase of inner mitochondrial membrane 21(TIMM21)
CCDC134		ANO4	121601	Homo sapiens	anoctamin 4(ANO4)
RP3-414A15.2		USP30-AS1	100131733	Homo sapiens	USP30 antisense RNA 1(USP30-AS1)
SPANXB2		PNMA6A	84968	Homo sapiens	paraneoplastic Ma antigen family member 6A(PNMA6A)
COQ2		MMP12	4321	Homo sapiens	matrix metallopeptidase 12(MMP12)
CXCR2P1		VWA8	23078	Homo sapiens	von Willebrand factor A domain containing 8(VWA8)
CTLA4		ITPKC	80271	Homo sapiens	inositol-trisphosphate 3-kinase C(ITPKC)
RP4-620E11.5		RNU7-197P	106480455	Homo sapiens	RNA, U7 small nuclear 197 pseudogene(RNU7-197P)
POU6F2-AS2		HAP1	9001	Homo sapiens	huntingtin associated protein 1(HAP1)
CATSPER1		PABPC1	26986	Homo sapiens	poly(A) binding protein cytoplasmic 1(PABPC1)
APOL1		SLC18B1	116843	Homo sapiens	solute carrier family 18 member B1(SLC18B1)
IL2RB		SAMD12-AS1	552860	Homo sapiens	SAMD12 antisense RNA 1(SAMD12-AS1)
PLD5		DNASE1L1	1774	Homo sapiens	deoxyribonuclease 1 like 1(DNASE1L1)
SIRPG		SUMO2P19	100422265	Homo sapiens	SUMO2 pseudogene 19(SUMO2P19)
KCNK9		GRP	2922	Homo sapiens	gastrin releasing peptide(GRP)
PAGE2B		STX18	53407	Homo sapiens	syntaxin 18(STX18)
TTI2		ATP5A1	498	Homo sapiens	ATP synthase, H+ transporting, mitochondrial F1 complex, alpha subunit 1, cardiac muscle(ATP5A1)
TAP1		LRRC17	10234	Homo sapiens	leucine rich repeat containing 17(LRRC17)
ALDH3A2		CXCR6	10663	Homo sapiens	C-X-C motif chemokine receptor 6(CXCR6)
CYP4F44P		TYMS	7298	Homo sapiens	thymidylate synthetase(TYMS)
ABHD3		SLC7A1	6541	Homo sapiens	solute carrier family 7 member 1(SLC7A1)
IL20RB		APOL6	80830	Homo sapiens	apolipoprotein L6(APOL6)
HMGN2P15		CUX1	1523	Homo sapiens	cut like homeobox 1(CUX1)
BEX4		GBX2	2637	Homo sapiens	gastrulation brain homeobox 2(GBX2)
FARP1		HSF1	3297	Homo sapiens	heat shock transcription factor 1(HSF1)
CACNG4		LINC00996	285972	Homo sapiens	long intergenic non-protein coding RNA 996(LINC00996)
IFNG		LINC-PINT	378805	Homo sapiens	long intergenic non-protein coding RNA, p53 induced transcript(LINC-PINT)
AC234917.1		LY6G6C	80740	Homo sapiens	lymphocyte antigen 6 complex, locus G6C(LY6G6C)
IL12RB1		IL12RB1	3594	Homo sapiens	interleukin 12 receptor subunit beta 1(IL12RB1)
FAM26F		APOL1	8542	Homo sapiens	apolipoprotein L1(APOL1)
CTD-2293H3.2		GABRD	2563	Homo sapiens	gamma-aminobutyric acid type A receptor delta subunit(GABRD)
TPT1-AS1		LY6G6E	79136	Homo sapiens	lymphocyte antigen 6 complex, locus G6E(LY6G6E)
CTD-2591A6.2		APOL3	80833	Homo sapiens	apolipoprotein L3(APOL3)
C11orf95		CYP4F44P	106480733	Homo sapiens	cytochrome P450 family 4 subfamily F member 44, pseudogene(CYP4F44P)
GABRD		LY6G6F	259215	Homo sapiens	lymphocyte antigen 6 complex, locus G6F(LY6G6F)
GRP		APOL2	23780	Homo sapiens	apolipoprotein L2(APOL2)
UBE2L6		GNAS-AS1	149775	Homo sapiens	GNAS antisense RNA 1(GNAS-AS1)
RP11-304F15.4		C11ORF63	79864	Homo sapiens	chromosome 11 open reading frame 63(C11orf63)
RNF19B		OFCC1	266553	Homo sapiens	orofacial cleft 1 candidate 1(OFCC1)
MOCOS		CD74	972	Homo sapiens	CD74 molecule(CD74)
CCDC68		TRBV28	28559	Homo sapiens	T cell receptor beta variable 28(TRBV28)
ATP6V1B2		FARP1	10160	Homo sapiens	FERM, ARH/RhoGEF and pleckstrin domain protein 1(FARP1)
CEP76		TPK1	27010	Homo sapiens	thiamin pyrophosphokinase 1(TPK1)
RP1-290I10.5		FAM46C	54855	Homo sapiens	family with sequence similarity 46 member C(FAM46C)
AC011747.6		STAT1	6772	Homo sapiens	signal transducer and activator of transcription 1(STAT1)
PARP3		KCNB2	9312	Homo sapiens	potassium voltage-gated channel subfamily B member 2(KCNB2)
OR2I1P		PCGF2	7703	Homo sapiens	polycomb group ring finger 2(PCGF2)
NDUFA9		GSR	2936	Homo sapiens	glutathione-disulfide reductase(GSR)
CHMP7		SPRYD7	57213	Homo sapiens	SPRY domain containing 7(SPRYD7)
RP11-723J4.3		MOCOS	55034	Homo sapiens	molybdenum cofactor sulfurase(MOCOS)
GPATCH3		PSMB9	5698	Homo sapiens	proteasome subunit beta 9(PSMB9)
TACR3		POU6F2-AS2	100689074	Homo sapiens	POU6F2 antisense RNA 2(POU6F2-AS2)
GDI1		RNU6-801P	106479920	Homo sapiens	RNA, U6 small nuclear 801, pseudogene(RNU6-801P)
LMO7		ETNK2	55224	Homo sapiens	ethanolamine kinase 2(ETNK2)
PBK		CFHR4	10877	Homo sapiens	complement factor H related 4(CFHR4)
RP11-304F15.6		LINC00508	104472718	Homo sapiens	long intergenic non-protein coding RNA 508(LINC00508)
RP11-166N6.1		R3HCC1	203069	Homo sapiens	R3H domain and coiled-coil containing 1(R3HCC1)
GNGT1		TACC3	10460	Homo sapiens	transforming acidic coiled-coil containing protein 3(TACC3)
AC007193.6		CENPM	79019	Homo sapiens	centromere protein M(CENPM)
ZNF385C		FAS	355	Homo sapiens	Fas cell surface death receptor(FAS)
RAMP2-AS1		ZNF334	55713	Homo sapiens	zinc finger protein 334(ZNF334)
TMEM105		CAPS	828	Homo sapiens	calcyphosine(CAPS)
EIF3H		SLC28A3	64078	Homo sapiens	solute carrier family 28 member 3(SLC28A3)
DUX4L27		FOXA1	3169	Homo sapiens	forkhead box A1(FOXA1)
ATF6B		UPK2	7379	Homo sapiens	uroplakin 2(UPK2)
RP3-326L13.2		SIRPG	55423	Homo sapiens	signal regulatory protein gamma(SIRPG)
PCGF2		TRAC	28755	Homo sapiens	T-cell receptor alpha constant(TRAC)
SLC41A3		RNF19B	127544	Homo sapiens	ring finger protein 19B(RNF19B)
KB-1460A1.5		LAMP5	24141	Homo sapiens	lysosomal associated membrane protein family member 5(LAMP5)
ARL8A		FADS6	283985	Homo sapiens	fatty acid desaturase 6(FADS6)
RNU6-100P		MPZ	4359	Homo sapiens	myelin protein zero(MPZ)
RNU6-1159P		NUDT18	79873	Homo sapiens	nudix hydrolase 18(NUDT18)
CDIPT		RNU6-100P	106481208	Homo sapiens	RNA, U6 small nuclear 100, pseudogene(RNU6-100P)
RTP4		C11ORF84	144097	Homo sapiens	chromosome 11 open reading frame 84(C11orf84)
AC141928.1		PAGE2B	389860	Homo sapiens	PAGE family member 2B(PAGE2B)
KIR2DL4		TAP1	6890	Homo sapiens	transporter 1, ATP binding cassette subfamily B member(TAP1)
HOTAIR		LMO7	4008	Homo sapiens	LIM domain 7(LMO7)
RP11-326C3.15		PGD	5226	Homo sapiens	phosphogluconate dehydrogenase(PGD)
FASLG		CXCR2P1	3580	Homo sapiens	C-X-C motif chemokine receptor 2 pseudogene 1(CXCR2P1)
NUDT18		SRCIN1	80725	Homo sapiens	SRC kinase signaling inhibitor 1(SRCIN1)
CDCA2		DHDDS	79947	Homo sapiens	dehydrodolichyl diphosphate synthase subunit(DHDDS)
SLIT1		ALDH3A2	224	Homo sapiens	aldehyde dehydrogenase 3 family member A2(ALDH3A2)
RP11-276H19.2		CACNB3	784	Homo sapiens	calcium voltage-gated channel auxiliary subunit beta 3(CACNB3)
TRBC2		DOK2	9046	Homo sapiens	docking protein 2(DOK2)
HLA-DRA		CD8A	925	Homo sapiens	CD8a molecule(CD8A)
LL22NC03-N14H11.1		RRNAD1	51093	Homo sapiens	ribosomal RNA adenine dimethylase domain containing 1(RRNAD1)
CTA-204B4.2		C6ORF25	80739	Homo sapiens	chromosome 6 open reading frame 25(C6orf25)
AP003354.1		STIM2	57620	Homo sapiens	stromal interaction molecule 2(STIM2)
AL365274.1		ODF3B	440836	Homo sapiens	outer dense fiber of sperm tails 3B(ODF3B)
MIR4666B		CARD16	114769	Homo sapiens	caspase recruitment domain family member 16(CARD16)
MUC20		PHLDB3	653583	Homo sapiens	pleckstrin homology like domain family B member 3(PHLDB3)
RP11-107M16.2		ARL8A	127829	Homo sapiens	ADP ribosylation factor like GTPase 8A(ARL8A)
TIGIT		CD274	29126	Homo sapiens	CD274 molecule(CD274)
CD247		C11ORF95	65998	Homo sapiens	chromosome 11 open reading frame 95(C11orf95)
RNU6-801P		RNU6-75P	100873776	Homo sapiens	RNA, U6 small nuclear 75, pseudogene(RNU6-75P)
SRCIN1		NDRG4	65009	Homo sapiens	NDRG family member 4(NDRG4)
CAPS		FECH	2235	Homo sapiens	ferrochelatase(FECH)
RP11-386G11.5		ABHD3	171586	Homo sapiens	abhydrolase domain containing 3(ABHD3)
AC093162.1		SLC41A3	54946	Homo sapiens	solute carrier family 41 member 3(SLC41A3)
NOS2		ALOX15	246	Homo sapiens	arachidonate 15-lipoxygenase(ALOX15)
BTN3A3		FLJ37505	400087	Homo sapiens	uncharacterized LOC400087(FLJ37505)
STAT1		PLD5	200150	Homo sapiens	phospholipase D family member 5(PLD5)
RP11-80F22.15		TNFRSF11A	8792	Homo sapiens	TNF receptor superfamily member 11a(TNFRSF11A)
SAPCD1-AS1		RASGRP1	10125	Homo sapiens	RAS guanyl releasing protein 1(RASGRP1)
GOLGA8IP		KRT40	125115	Homo sapiens	keratin 40(KRT40)
IL15		KIR2DL4	3805	Homo sapiens	killer cell immunoglobulin like receptor, two Ig domains and long cytoplasmic tail 4(KIR2DL4)
RNU6-411P		MGAT4EP	641515	Homo sapiens	MGAT4 family member E, pseudogene(MGAT4EP)
CACNB3		TRGC1	6966	Homo sapiens	T cell receptor gamma constant 1(TRGC1)
TMTC4		PCSK1N	27344	Homo sapiens	proprotein convertase subtilisin/kexin type 1 inhibitor(PCSK1N)
ETNK2		C6ORF15	29113	Homo sapiens	chromosome 6 open reading frame 15(C6orf15)
KRT40		MED30	90390	Homo sapiens	mediator complex subunit 30(MED30)
LY6G6F		UBD	10537	Homo sapiens	ubiquitin D(UBD)
LINC00114		TRGC2	6967	Homo sapiens	T cell receptor gamma constant 2(TRGC2)
SLC7A1		CCDC134	79879	Homo sapiens	coiled-coil domain containing 134(CCDC134)
DNASE1L1		RARRES3	5920	Homo sapiens	retinoic acid receptor responder 3(RARRES3)
TPK1		TNFRSF9	3604	Homo sapiens	TNF receptor superfamily member 9(TNFRSF9)
RP11-1038A11.3		ZBTB10	65986	Homo sapiens	zinc finger and BTB domain containing 10(ZBTB10)
PSME1		NKG7	4818	Homo sapiens	natural killer cell granule protein 7(NKG7)
PABPC1		TRAPPC9	83696	Homo sapiens	trafficking protein particle complex 9(TRAPPC9)
LINC01322		TPTEP1	387590	Homo sapiens	transmembrane phosphatase with tensin homology pseudogene 1(TPTEP1)
BNIPL		SYT7	9066	Homo sapiens	synaptotagmin 7(SYT7)
NDRG4		CXCL10	3627	Homo sapiens	C-X-C motif chemokine ligand 10(CXCL10)
NUDT6		COQ2	27235	Homo sapiens	coenzyme Q2, polyprenyltransferase(COQ2)
MMP12		CXCL11	6373	Homo sapiens	C-X-C motif chemokine ligand 11(CXCL11)
DHDDS		PAN3	255967	Homo sapiens	PAN3 poly(A) specific ribonuclease subunit(PAN3)
TOP1MT		RGCC	28984	Homo sapiens	regulator of cell cycle(RGCC)
RP11-624L4.1		HLA-DRA	3122	Homo sapiens	major histocompatibility complex, class II, DR alpha(HLA-DRA)
NUFIP1		FAM26F	441168	Homo sapiens	family with sequence similarity 26 member F(FAM26F)
NR1D1		DNAJC3-AS1	100289274	Homo sapiens	DNAJC3 antisense RNA 1 (head to head)(DNAJC3-AS1)
RP1-135L22.1		SERINC3	10955	Homo sapiens	serine incorporator 3(SERINC3)
RP11-545D19.1		SPERT	220082	Homo sapiens	spermatid associated(SPERT)
CTSW		MUC20	200958	Homo sapiens	mucin 20, cell surface associated(MUC20)
SPRYD7		RTP4	64108	Homo sapiens	receptor transporter protein 4(RTP4)
DUXAP8		AGAP1-IT1	100506749	Homo sapiens	AGAP1 intronic transcript 1(AGAP1-IT1)
C11orf84		CIITA	4261	Homo sapiens	class II major histocompatibility complex transactivator(CIITA)
SERINC3		CXCL9	4283	Homo sapiens	C-X-C motif chemokine ligand 9(CXCL9)
TNNC1		KCNK9	51305	Homo sapiens	potassium two pore domain channel subfamily K member 9(KCNK9)
TRBV28		FASLG	356	Homo sapiens	Fas ligand(FASLG)
CD3G		FAM178B	51252	Homo sapiens	family with sequence similarity 178 member B(FAM178B)
GBX2		TMEM105	284186	Homo sapiens	transmembrane protein 105(TMEM105)
TPTE2P1		TOP1MT	116447	Homo sapiens	topoisomerase (DNA) I, mitochondrial(TOP1MT)
RP11-191L9.4		ENOSF1	55556	Homo sapiens	enolase superfamily member 1(ENOSF1)
PTH1R		CASP1	834	Homo sapiens	caspase 1(CASP1)
RNU7-197P		ZNF385C	201181	Homo sapiens	zinc finger protein 385C(ZNF385C)
NLRC5		LINC01425	101927821	Homo sapiens	long intergenic non-protein coding RNA 1425(LINC01425)
GMDS		EFHD1	80303	Homo sapiens	EF-hand domain family member D1(EFHD1)
TSC22D3		TRIM69	140691	Homo sapiens	tripartite motif containing 69(TRIM69)
DOK2		PAN3-AS1	100288730	Homo sapiens	PAN3 antisense RNA 1(PAN3-AS1)
SUPT20H		SCN5A	6331	Homo sapiens	sodium voltage-gated channel alpha subunit 5(SCN5A)
BRI3BP		CSTL1	128817	Homo sapiens	cystatin like 1(CSTL1)
TPTEP1		PROSER2	254427	Homo sapiens	proline and serine rich 2(PROSER2)
INTS9		PIANP	196500	Homo sapiens	PILR alpha associated neural protein(PIANP)
RP4-660H19.1		ELAC1	55520	Homo sapiens	elaC ribonuclease Z 1(ELAC1)
TRAC		NGF	4803	Homo sapiens	nerve growth factor(NGF)
RP11-649G15.2		TTI2	80185	Homo sapiens	TELO2 interacting protein 2(TTI2)
LRRC17		HMGN2P15	100288165	Homo sapiens	high mobility group nucleosomal binding domain 2 pseudogene 15(HMGN2P15)
ICOS		IFNG	3458	Homo sapiens	interferon gamma(IFNG)
LINC-PINT		RNU6-1159P	106481939	Homo sapiens	RNA, U6 small nuclear 1159, pseudogene(RNU6-1159P)
OFCC1		IRF1	3659	Homo sapiens	interferon regulatory factor 1(IRF1)
SCML2P2		ATP6V1B2	526	Homo sapiens	ATPase H+ transporting V1 subunit B2(ATP6V1B2)
BX255923.2		ALMS1-IT1	100874291	Homo sapiens	ALMS1 intronic transcript 1(ALMS1-IT1)
HLA-DRB1		CHMP7	91782	Homo sapiens	charged multivesicular body protein 7(CHMP7)
TUFT1		TPT1-AS1	100190939	Homo sapiens	TPT1 antisense RNA 1(TPT1-AS1)
BIN3		TMEM55A	55529	Homo sapiens	transmembrane protein 55A(TMEM55A)
TACC3		CATSPER1	117144	Homo sapiens	cation channel sperm associated 1(CATSPER1)
SCN5A		SAA3P	6290	Homo sapiens	serum amyloid A3 pseudogene(SAA3P)
EPHA10		HDAC5	10014	Homo sapiens	histone deacetylase 5(HDAC5)
RP4-614O4.12		NUFIP1	26747	Homo sapiens	NUFIP1, FMR1 interacting protein 1(NUFIP1)
TNFRSF9		RNF34	80196	Homo sapiens	ring finger protein 34(RNF34)
OPCML		ATF6B	1388	Homo sapiens	activating transcription factor 6 beta(ATF6B)
PGD		PLAG1	5324	Homo sapiens	PLAG1 zinc finger(PLAG1)
BEX2		CCDC68	80323	Homo sapiens	coiled-coil domain containing 68(CCDC68)
FAS		TUFT1	7286	Homo sapiens	tuftelin 1(TUFT1)
AP000318.2		PALM3	342979	Homo sapiens	paralemmin 3(PALM3)
SAA3P		NLRC5	84166	Homo sapiens	NLR family CARD domain containing 5(NLRC5)
CD244		CYTH3	9265	Homo sapiens	cytohesin 3(CYTH3)
ZNF853		GMDS	2762	Homo sapiens	GDP-mannose 4,6-dehydratase(GMDS)
TRAPPC9		GNG4	2786	Homo sapiens	G protein subunit gamma 4(GNG4)
CTD-2619J13.13		CCL5	6352	Homo sapiens	C-C motif chemokine ligand 5(CCL5)
TIMM21		SLIT1	6585	Homo sapiens	slit guidance ligand 1(SLIT1)
DNAH17		LINC01322	103695433	Homo sapiens	long intergenic non-protein coding RNA 1322(LINC01322)
CARD16		CDIPT	10423	Homo sapiens	CDP-diacylglycerol--inositol 3-phosphatidyltransferase(CDIPT)
RP11-855O10.2		TIGIT	201633	Homo sapiens	T-cell immunoreceptor with Ig and ITIM domains(TIGIT)
LINC00508		GBP1	2633	Homo sapiens	guanylate binding protein 1(GBP1)
RP11-587P21.1		GBP4	115361	Homo sapiens	guanylate binding protein 4(GBP4)
ANXA9		LINC00114	400866	Homo sapiens	long intergenic non-protein coding RNA 114(LINC00114)
AGAP1-IT1		CACNG4	27092	Homo sapiens	calcium voltage-gated channel auxiliary subunit gamma 4(CACNG4)
ENOSF1		OPCML	4978	Homo sapiens	opioid binding protein/cell adhesion molecule like(OPCML)
PCSK1N		TUB	7275	Homo sapiens	tubby bipartite transcription factor(TUB)
PHLDB3		NDUFA9	4704	Homo sapiens	NADH:ubiquinone oxidoreductase subunit A9(NDUFA9)
RRS1		TRBV9	28586	Homo sapiens	T cell receptor beta variable 9(TRBV9)
LINC00407		RAMP2-AS1	100190938	Homo sapiens	RAMP2 antisense RNA 1(RAMP2-AS1)
AC093162.5		NDUFA6	4700	Homo sapiens	NADH:ubiquinone oxidoreductase subunit A6(NDUFA6)
AP000525.10		NOS2	4843	Homo sapiens	nitric oxide synthase 2(NOS2)
RP11-669N7.2		GZMA	3001	Homo sapiens	granzyme A(GZMA)
TUB		PML	5371	Homo sapiens	promyelocytic leukemia(PML)
ALOX15		CD2	914	Homo sapiens	CD2 molecule(CD2)
RP11-196G18.3		KLF7	8609	Homo sapiens	Kruppel like factor 7(KLF7)
ANO4		IL2RB	3560	Homo sapiens	interleukin 2 receptor subunit beta(IL2RB)
GNAS-AS1		EIF3H	8667	Homo sapiens	eukaryotic translation initiation factor 3 subunit H(EIF3H)
KLF7		CD247	919	Homo sapiens	CD247 molecule(CD247)
GBP5		ZNF853	54753	Homo sapiens	zinc finger protein 853(ZNF853)
NKG7		CD244	51744	Homo sapiens	CD244 molecule(CD244)
RP11-138H10.2		BNIPL	149428	Homo sapiens	BCL2 interacting protein like(BNIPL)
CCDC109B
C5orf56
TYMSOS
HAP1
KCNB2
FAM46C
SUMO2P19
RP11-742B18.1
INTS10
RP11-156P1.3
MED30
SLA2
RNF34
CD274
RP11-120I21.3
FADS6
EFHD1
TMEM55A
LINC00973
KLHDC8A
RNF225
RP4-612B18.3
PRR15
SAMD12-AS1
CD8A
NUBP1
HSF1
AQP1
HOTAIR_5
CCL5
RP4-614O4.13
ALMS1-IT1
CCAR2
RP11-402P6.9
CAB39L
LINC01540
SCO2
RP11-542C10.1
RASGRP1
LINC00996
VWA8
WFDC10B
ODF3B
RRNAD1
RP11-327I22.5
RP11-157G21.2
RNU6-75P
SLAMF7
RP11-1217F2.7
ELAC1
ZNF34
TRBV9
AC024937.4
PALM3
AC012501.3
CYTH3
AC002331.1
PIANP
ZBTB10
NDUFA6
PML
FLJ37505
RP11-657O9.1
STIM2
TRGC2
R3HCC1
PNMA6A
NGF
FAM178B
SPIN3
DNAJC3-AS1
UXS1
RP11-113K21.3
IGSF9
PSMB9
RP11-104F15.9
AC006994.2
TRGC1
CENPM
CSTL1
ITPKC

## Sheet: GOBP
Category	Term	Count	%	PValue	Genes	List Total	Pop Hits	Pop Total	Fold Enrichment	Bonferroni	Benjamini	FDR
GOTERM_BP_DIRECT	GO:0006955~immune response	8	28.5714	1.92658e-06	CXCL10, CD74, CXCL11, CXCL9, CCL5, GZMA, HLA-DRA, HLA-DRB1	26	421	16792	12.2726	0.000629795	0.000629993	0.000597241
GOTERM_BP_DIRECT	GO:0030816~positive regulation of cAMP metabolic process	3	10.7143	3.18036e-05	CXCL10, CXCL11, CXCL9	26	6	16792	322.923	0.0103461	0.00519989	0.00492956
GOTERM_BP_DIRECT	GO:0032496~response to lipopolysaccharide	5	17.8571	9.4536e-05	CXCL10, CXCL11, CXCL9, CASP1, IDO1	26	164	16792	19.6904	0.0304418	0.010192	0.00966219
GOTERM_BP_DIRECT	GO:0043950~positive regulation of cAMP-mediated signaling	3	10.7143	0.000139171	CXCL10, CXCL11, CXCL9	26	12	16792	161.462	0.044492	0.010192	0.00966219
GOTERM_BP_DIRECT	GO:0070098~chemokine-mediated signaling pathway	4	14.2857	0.000155842	CXCL10, CXCL11, CXCL9, CCL5	26	71	16792	36.3857	0.0496873	0.010192	0.00966219
GOTERM_BP_DIRECT	GO:0002690~positive regulation of leukocyte chemotaxis	3	10.7143	0.000320862	CXCL10, CXCL11, CXCL9	26	18	16792	107.641	0.0996203	0.017487	0.0165779
GOTERM_BP_DIRECT	GO:0051281~positive regulation of release of sequestered calcium ion into cytosol	3	10.7143	0.000730076	CXCL10, CXCL11, CXCL9	26	27	16792	71.7607	0.212445	0.0312984	0.0296713
GOTERM_BP_DIRECT	GO:0006935~chemotaxis	4	14.2857	0.000765711	CXCL10, CXCL11, CXCL9, CCL5	26	122	16792	21.1753	0.221576	0.0312984	0.0296713
GOTERM_BP_DIRECT	GO:0042127~regulation of cell proliferation	4	14.2857	0.00253138	CXCL10, CXCL11, CXCL9, NOS2	26	185	16792	13.9642	0.563431	0.089508	0.0848547
GOTERM_BP_DIRECT	GO:0002506~polysaccharide assembly with MHC class II protein complex	2	7.14286	0.00297548	HLA-DRA, HLA-DRB1	26	2	16792	645.846	0.622594	0.089508	0.0848547
GOTERM_BP_DIRECT	GO:0019882~antigen processing and presentation	3	10.7143	0.00301097	CD74, HLA-DRA, HLA-DRB1	26	55	16792	35.228	0.626961	0.089508	0.0848547
GOTERM_BP_DIRECT	GO:0060326~cell chemotaxis	3	10.7143	0.00417919	CXCL10, CXCL9, CCL5	26	65	16792	29.8083	0.745755	0.11154	0.105742
GOTERM_BP_DIRECT	GO:0050796~regulation of insulin secretion	3	10.7143	0.00443432	NOS2, CCL5, SYT7	26	67	16792	28.9185	0.76619	0.11154	0.105742
GOTERM_BP_DIRECT	GO:0060333~interferon-gamma-mediated signaling pathway	3	10.7143	0.00496576	HLA-DRA, GBP1, HLA-DRB1	26	71	16792	27.2893	0.803648	0.115986	0.109956
GOTERM_BP_DIRECT	GO:0007267~cell-cell signaling	4	14.2857	0.00615089	CXCL10, CXCL11, CXCL9, CCL5	26	254	16792	10.1708	0.867019	0.134089	0.127118
GOTERM_BP_DIRECT	GO:0002503~peptide antigen assembly with MHC class II protein complex	2	7.14286	0.00742277	HLA-DRA, HLA-DRB1	26	5	16792	258.338	0.912516	0.151703	0.143816
GOTERM_BP_DIRECT	GO:0019886~antigen processing and presentation of exogenous peptide antigen via MHC class II	3	10.7143	0.00820677	CD74, HLA-DRA, HLA-DRB1	26	92	16792	21.0602	0.932436	0.15786	0.149653
GOTERM_BP_DIRECT	GO:0002830~positive regulation of type 2 immune response	2	7.14286	0.00890096	CD74, IDO1	26	6	16792	215.282	0.946263	0.161701	0.153294
GOTERM_BP_DIRECT	GO:0007186~G-protein coupled receptor signaling pathway	6	21.4286	0.00943931	CXCL10, CXCL11, CXCL9, OR2I1P, GNG4, CCL5	26	899	16792	4.31043	0.95501	0.162455	0.15401
GOTERM_BP_DIRECT	GO:0070233~negative regulation of T cell apoptotic process	2	7.14286	0.010377	CCL5, IDO1	26	7	16792	184.527	0.966993	0.169665	0.160844
GOTERM_BP_DIRECT	GO:0010818~T cell chemotaxis	2	7.14286	0.011851	CXCL10, CXCL11	26	8	16792	161.462	0.979726	0.184537	0.174944
GOTERM_BP_DIRECT	GO:0070234~positive regulation of T cell apoptotic process	2	7.14286	0.0133229	CCL5, IDO1	26	9	16792	143.521	0.987548	0.198026	0.187731
GOTERM_BP_DIRECT	GO:2000406~positive regulation of T cell migration	2	7.14286	0.0147926	CXCL10, CCL5	26	10	16792	129.169	0.992352	0.210313	0.199379
GOTERM_BP_DIRECT	GO:0006954~inflammatory response	4	14.2857	0.0181571	CXCL10, CXCL11, CXCL9, CCL5	26	379	16792	6.81632	0.997501	0.24739	0.234529
GOTERM_BP_DIRECT	GO:0090026~positive regulation of monocyte chemotaxis	2	7.14286	0.0235671	CXCL10, CCL5	26	16	16792	80.7308	0.99959	0.303047	0.287292
GOTERM_BP_DIRECT	GO:0051607~defense response to virus	3	10.7143	0.0248295	CXCL10, CXCL9, GBP1	26	165	16792	11.7427	0.999731	0.303047	0.287292
GOTERM_BP_DIRECT	GO:0002504~antigen processing and presentation of peptide or polysaccharide antigen via MHC class II	2	7.14286	0.0250222	HLA-DRA, HLA-DRB1	26	17	16792	75.9819	0.999748	0.303047	0.287292
GOTERM_BP_DIRECT	GO:0019835~cytolysis	2	7.14286	0.0308219	GZMA, APOL1	26	21	16792	61.5092	0.999964	0.359955	0.341242
Category	Term	Count	%	PValue	Genes	List Total	Pop Hits	Pop Total	Fold Enrichment	Bonferroni	Benjamini	FDR
GOTERM_BP_DIRECT	GO:0031295~T cell costimulation	8	4.16667	6.6897e-06	CD274, TRAC, HLA-DRA, CTLA4, CD3G, CD247, CD3D, HLA-DRB1	153	78	16792	11.2566	0.0065079	0.00652915	0.00648232
GOTERM_BP_DIRECT	GO:0060333~interferon-gamma-mediated signaling pathway	7	3.64583	4.39496e-05	CIITA, STAT1, IRF1, HLA-DRA, GBP1, HLA-DRB1, PML	153	71	16792	10.8206	0.0419887	0.0197142	0.0195728
GOTERM_BP_DIRECT	GO:0050852~T cell receptor signaling pathway	9	4.6875	6.05969e-05	TRAC, PSME1, HLA-DRA, PSME2, CD3G, CD247, CD3D, HLA-DRB1, PSMB9	153	148	16792	6.67409	0.0574293	0.0197142	0.0195728
GOTERM_BP_DIRECT	GO:0006955~immune response	14	7.29167	0.000120132	CD274, CD74, CIITA, CXCL9, GZMA, CTSW, CXCL10, CXCL11, CD8A, CCL5, FAS, HLA-DRA, CTLA4, HLA-DRB1	153	421	16792	3.6497	0.110642	0.025312	0.0251305
GOTERM_BP_DIRECT	GO:0051607~defense response to virus	9	4.6875	0.000129672	CXCL10, CXCL9, STAT1, CD8A, IRF1, NLRC5, SERINC3, GBP1, PML	153	165	16792	5.98645	0.118886	0.025312	0.0251305
GOTERM_BP_DIRECT	GO:0006954~inflammatory response	12	6.25	0.000677897	GBP5, CXCL10, HDAC5, CIITA, CXCL11, CXCL9, CCL5, ALOX15, FAS, CXCR6, TNFRSF11A, APOL3	153	379	16792	3.47499	0.484105	0.102934	0.102196
GOTERM_BP_DIRECT	GO:0032496~response to lipopolysaccharide	8	4.16667	0.000738257	CXCL10, CXCL11, CXCL9, PALM3, CASP1, FAS, TNFRSF11A, IDO1	153	164	16792	5.35374	0.513639	0.102934	0.102196
GOTERM_BP_DIRECT	GO:0045345~positive regulation of MHC class I biosynthetic process	3	1.5625	0.00119225	CIITA, NLRC5, PML	153	6	16792	54.8758	0.687868	0.121665	0.120792
GOTERM_BP_DIRECT	GO:0030816~positive regulation of cAMP metabolic process	3	1.5625	0.00119225	CXCL10, CXCL11, CXCL9	153	6	16792	54.8758	0.687868	0.121665	0.120792
GOTERM_BP_DIRECT	GO:0034097~response to cytokine	5	2.60417	0.00124657	CD274, STAT1, TNFRSF11A, TYMS, PML	153	52	16792	10.553	0.704004	0.121665	0.120792
GOTERM_BP_DIRECT	GO:0071346~cellular response to interferon-gamma	5	2.60417	0.00175641	GBP5, CIITA, NOS2, CCL5, IL12RB1	153	57	16792	9.62734	0.820174	0.155842	0.154724
GOTERM_BP_DIRECT	GO:0071222~cellular response to lipopolysaccharide	6	3.125	0.00364766	CXCL10, HDAC5, NOS2, GFI1, HSF1, NR1D1	153	113	16792	5.82752	0.971749	0.29062	0.288536
GOTERM_BP_DIRECT	GO:0070098~chemokine-mediated signaling pathway	5	2.60417	0.00391888	CXCL10, CXCL11, CXCL9, CCL5, CXCR6	153	71	16792	7.72899	0.978341	0.29062	0.288536
GOTERM_BP_DIRECT	GO:0033209~tumor necrosis factor-mediated signaling pathway	6	3.125	0.00438647	STAT1, PSME1, FAS, PSME2, TNFRSF11A, PSMB9	153	118	16792	5.58059	0.986303	0.29062	0.288536
GOTERM_BP_DIRECT	GO:0042130~negative regulation of T cell proliferation	4	2.08333	0.00450978	CTLA4, IL20RB, HLA-DRB1, IDO1	153	37	16792	11.865	0.987863	0.29062	0.288536
GOTERM_BP_DIRECT	GO:0042157~lipoprotein metabolic process	4	2.08333	0.00486419	APOL6, APOL1, APOL3, APOL2	153	38	16792	11.5528	0.991426	0.29062	0.288536
GOTERM_BP_DIRECT	GO:0043950~positive regulation of cAMP-mediated signaling	3	1.5625	0.00506203	CXCL10, CXCL11, CXCL9	153	12	16792	27.4379	0.992938	0.29062	0.288536
GOTERM_BP_DIRECT	GO:0050776~regulation of immune response	7	3.64583	0.00563564	CD8A, IRF1, TRAC, SLAMF7, CD3G, CD247, CD3D	153	178	16792	4.31608	0.995978	0.305577	0.303385
GOTERM_BP_DIRECT	GO:0002690~positive regulation of leukocyte chemotaxis	3	1.5625	0.0113252	CXCL10, CXCL11, CXCL9	153	18	16792	18.2919	0.999985	0.581756	0.577584
GOTERM_BP_DIRECT	GO:0007166~cell surface receptor signaling pathway	8	4.16667	0.012458	CD2, CD274, CXCL10, DOK2, CD8A, CD3G, CD247, CD3D	153	274	16792	3.20443	0.999995	0.607951	0.603591
GOTERM_BP_DIRECT	GO:0019882~antigen processing and presentation	4	2.08333	0.0135311	CD74, CD8A, HLA-DRA, HLA-DRB1	153	55	16792	7.98194	0.999998	0.628873	0.624363
GOTERM_BP_DIRECT	GO:0060086~circadian temperature homeostasis	2	1.04167	0.0180225	NR1D1, TNFRSF11A	153	2	16792	109.752	1	0.737461	0.732172
GOTERM_BP_DIRECT	GO:0002506~polysaccharide assembly with MHC class II protein complex	2	1.04167	0.0180225	HLA-DRA, HLA-DRB1	153	2	16792	109.752	1	0.737461	0.732172
GOTERM_BP_DIRECT	GO:0016525~negative regulation of angiogenesis	4	2.08333	0.0186355	CXCL10, RGCC, STAT1, PML	153	62	16792	7.08075	1	0.737461	0.732172
GOTERM_BP_DIRECT	GO:0055114~oxidation-reduction process	12	6.25	0.0188899	ALDH3A2, DHRS12, NDUFA6, GDI1, NOS2, FADS6, SCO2, ALOX15, GSR, ASPHD2, PGD, IDO1	153	592	16792	2.2247	1	0.737461	0.732172
GOTERM_BP_DIRECT	GO:0006461~protein complex assembly	5	2.60417	0.0211645	CD74, IL2RB, FAS, CD3G, PML	153	116	16792	4.73067	1	0.794485	0.788786
GOTERM_BP_DIRECT	GO:0006952~defense response	4	2.08333	0.0228493	CD74, CXCL9, HSF1, TAP1	153	67	16792	6.55234	1	0.820825	0.814938
GOTERM_BP_DIRECT	GO:0051281~positive regulation of release of sequestered calcium ion into cytosol	3	1.5625	0.0246403	CXCL10, CXCL11, CXCL9	153	27	16792	12.1946	1	0.820825	0.814938
GOTERM_BP_DIRECT	GO:0006935~chemotaxis	5	2.60417	0.0249166	CXCL10, CXCL11, CXCL9, CCL5, CXCR6	153	122	16792	4.49802	1	0.820825	0.814938
GOTERM_BP_DIRECT	GO:0032689~negative regulation of interferon-gamma production	3	1.5625	0.0263805	CD274, IL20RB, HLA-DRB1	153	28	16792	11.7591	1	0.820825	0.814938
GOTERM_BP_DIRECT	GO:0071260~cellular response to mechanical stimulus	4	2.08333	0.0265624	IRF1, CASP1, FAS, AQP1	153	71	16792	6.18319	1	0.820825	0.814938
GOTERM_BP_DIRECT	GO:0045590~negative regulation of regulatory T cell differentiation	2	1.04167	0.0269123	IRF1, CTLA4	153	3	16792	73.1678	1	0.820825	0.814938
GOTERM_BP_DIRECT	GO:0001937~negative regulation of endothelial cell proliferation	3	1.5625	0.028169	RGCC, STAT1, ATP5A1	153	29	16792	11.3536	1	0.833119	0.827144
GOTERM_BP_DIRECT	GO:0007623~circadian rhythm	4	2.08333	0.0305788	NOS2, FAS, NR1D1, TYMS	153	75	16792	5.85342	1	0.877793	0.871497
GOTERM_BP_DIRECT	GO:0006869~lipid transport	4	2.08333	0.0316301	APOL6, APOL1, APOL3, APOL2	153	76	16792	5.7764	1	0.882028	0.875702
GOTERM_BP_DIRECT	GO:0007165~signal transduction	18	9.375	0.0336924	CD274, CD74, CXCL9, GDI1, GRP, ATF6B, TNFRSF11A, CXCL10, CXCL11, DOK2, BCAM, IL2RB, CASP1, FAS, ANXA9, IL12RB1, GABRD, APOL3	153	1161	16792	1.70158	1	0.913438	0.906886
GOTERM_BP_DIRECT	GO:0046006~regulation of activated T cell proliferation	2	1.04167	0.0357222	CD274, IDO1	153	4	16792	54.8758	1	0.942294	0.935535
GOTERM_BP_DIRECT	GO:0002503~peptide antigen assembly with MHC class II protein complex	2	1.04167	0.0444529	HLA-DRA, HLA-DRB1	153	5	16792	43.9007	1	1	0.993846
GOTERM_BP_DIRECT	GO:0042981~regulation of apoptotic process	6	3.125	0.0445141	BEX2, STAT1, CASP1, FAS, CARD16, TNFRSF11A	153	213	16792	3.0916	1	1	0.993846
GOTERM_BP_DIRECT	GO:0002250~adaptive immune response	5	2.60417	0.0456033	CTLA4, RNF19B, TAP1, SLAMF7, TNFRSF11A	153	148	16792	3.70783	1	1	0.993846
Category	Term	Count	%	PValue	Genes	List Total	Pop Hits	Pop Total	Fold Enrichment	Bonferroni	Benjamini	FDR
GOTERM_BP_DIRECT	GO:0006955~immune response	20	6.75676	1.38383e-06	CD274, CD74, CIITA, CXCL9, IL15, TNFRSF9, GZMA, FASLG, CTSW, CXCL10, CXCL11, IFNG, CD8A, CCL5, FAS, HLA-DRA, CTLA4, ICOS, HLA-DRB1, TRGC2	210	421	16792	3.79867	0.00175454	0.00175608	0.00174916
GOTERM_BP_DIRECT	GO:0031295~T cell costimulation	9	3.04054	5.5963e-06	CD274, TRAC, HLA-DRA, CTLA4, CD3G, CD247, ICOS, CD3D, HLA-DRB1	210	78	16792	9.22637	0.00707656	0.00355085	0.00353686
GOTERM_BP_DIRECT	GO:0050852~T cell receptor signaling pathway	11	3.71622	1.64785e-05	CACNB3, IFNG, TRAC, PSME1, HLA-DRA, PSME2, CD3G, CD247, CD3D, HLA-DRB1, PSMB9	210	148	16792	5.94311	0.0206943	0.00697043	0.00694296
GOTERM_BP_DIRECT	GO:0060333~interferon-gamma-mediated signaling pathway	8	2.7027	2.83454e-05	CIITA, IFNG, STAT1, IRF1, HLA-DRA, GBP1, HLA-DRB1, PML	210	71	16792	9.00979	0.0353315	0.00899257	0.00895714
GOTERM_BP_DIRECT	GO:0032496~response to lipopolysaccharide	10	3.37838	0.000216335	CXCL10, CXCL11, CXCL9, TNFRSF9, PALM3, CASP1, FAS, FASLG, TNFRSF11A, IDO1	210	164	16792	4.87573	0.240093	0.0476186	0.047431
GOTERM_BP_DIRECT	GO:0051607~defense response to virus	10	3.37838	0.000225147	CXCL10, CXCL9, IFNG, STAT1, CD8A, IRF1, NLRC5, SERINC3, GBP1, PML	210	165	16792	4.84618	0.248545	0.0476186	0.047431
GOTERM_BP_DIRECT	GO:0033209~tumor necrosis factor-mediated signaling pathway	8	2.7027	0.000687201	STAT1, TNFRSF9, PSME1, FAS, PSME2, FASLG, TNFRSF11A, PSMB9	210	118	16792	5.42115	0.582035	0.12458	0.124089
GOTERM_BP_DIRECT	GO:0006954~inflammatory response	14	4.72973	0.000946593	GBP5, HDAC5, CIITA, CXCL9, IL15, TNFRSF9, ALOX15, CXCR6, TNFRSF11A, CXCL10, CXCL11, CCL5, FAS, APOL3	210	379	16792	2.95374	0.699346	0.150153	0.149562
GOTERM_BP_DIRECT	GO:0050776~regulation of immune response	9	3.04054	0.00176006	CD8A, IRF1, TRAC, SLAMF7, CD3G, CD247, SLA2, CD3D, KIR2DL4	210	178	16792	4.04302	0.893059	0.248168	0.24719
GOTERM_BP_DIRECT	GO:0030816~positive regulation of cAMP metabolic process	3	1.01351	0.00223772	CXCL10, CXCL11, CXCL9	210	6	16792	39.981	0.941741	0.258152	0.257135
GOTERM_BP_DIRECT	GO:0045345~positive regulation of MHC class I biosynthetic process	3	1.01351	0.00223772	CIITA, NLRC5, PML	210	6	16792	39.981	0.941741	0.258152	0.257135
GOTERM_BP_DIRECT	GO:0006869~lipid transport	6	2.02703	0.00257108	APOL6, CFHR4, ANO4, APOL1, APOL3, APOL2	210	76	16792	6.31278	0.961876	0.271891	0.27082
GOTERM_BP_DIRECT	GO:0071222~cellular response to lipopolysaccharide	7	2.36486	0.00289915	CXCL10, HDAC5, IFNG, NOS2, GFI1, HSF1, NR1D1	210	113	16792	4.95339	0.974887	0.283001	0.281886
GOTERM_BP_DIRECT	GO:0034097~response to cytokine	5	1.68919	0.00395819	CD274, STAT1, TNFRSF11A, TYMS, PML	210	52	16792	7.68864	0.99348	0.347622	0.346252
GOTERM_BP_DIRECT	GO:1902715~positive regulation of interferon-gamma secretion	3	1.01351	0.004109	CD2, RASGRP1, CD244	210	8	16792	29.9857	0.99462	0.347622	0.346252
GOTERM_BP_DIRECT	GO:0019882~antigen processing and presentation	5	1.68919	0.00484445	CD74, IFNG, CD8A, HLA-DRA, HLA-DRB1	210	55	16792	7.26926	0.997893	0.384226	0.382712
GOTERM_BP_DIRECT	GO:0071346~cellular response to interferon-gamma	5	1.68919	0.00550392	GBP5, CIITA, NOS2, CCL5, IL12RB1	210	57	16792	7.0142	0.999092	0.410851	0.409233
GOTERM_BP_DIRECT	GO:0016525~negative regulation of angiogenesis	5	1.68919	0.00740829	CXCL10, RGCC, STAT1, FASLG, PML	210	62	16792	6.44854	0.99992	0.500065	0.498094
GOTERM_BP_DIRECT	GO:0007166~cell surface receptor signaling pathway	10	3.37838	0.00748718	CD2, CD274, CXCL10, DOK2, IFNG, CD8A, CD3G, PTH1R, CD247, CD3D	210	274	16792	2.91832	0.999928	0.500065	0.498094
GOTERM_BP_DIRECT	GO:0043950~positive regulation of cAMP-mediated signaling	3	1.01351	0.00937331	CXCL10, CXCL11, CXCL9	210	12	16792	19.9905	0.999994	0.577779	0.575502
GOTERM_BP_DIRECT	GO:0007165~signal transduction	25	8.44595	0.00994636	CD274, CXCL9, GDI1, GRP, ATF6B, FASLG, TNFRSF11A, RASGRP1, KIR2DL4, GNGT1, CASP1, ANXA9, IL12RB1, GABRD, APOL3, TRGC2, CD74, IL15, CXCL10, DOK2, BCAM, CXCL11, IL2RB, FAS, CD244	210	1161	16792	1.72183	0.999997	0.577779	0.575502
GOTERM_BP_DIRECT	GO:0002250~adaptive immune response	7	2.36486	0.010591	IFNG, CTLA4, RNF19B, TAP1, SLAMF7, TNFRSF11A, CD244	210	148	16792	3.78198	0.999999	0.577779	0.575502
GOTERM_BP_DIRECT	GO:0042130~negative regulation of T cell proliferation	4	1.35135	0.010819	CTLA4, IL20RB, HLA-DRB1, IDO1	210	37	16792	8.64453	0.999999	0.577779	0.575502
GOTERM_BP_DIRECT	GO:0008625~extrinsic apoptotic signaling pathway via death domain receptors	4	1.35135	0.0116404	TNFRSF9, FAS, FASLG, NGF	210	38	16792	8.41704	1	0.577779	0.575502
GOTERM_BP_DIRECT	GO:0042157~lipoprotein metabolic process	4	1.35135	0.0116404	APOL6, APOL1, APOL3, APOL2	210	38	16792	8.41704	1	0.577779	0.575502
GOTERM_BP_DIRECT	GO:0070098~chemokine-mediated signaling pathway	5	1.68919	0.0118379	CXCL10, CXCL11, CXCL9, CCL5, CXCR6	210	71	16792	5.63112	1	0.577779	0.575502
GOTERM_BP_DIRECT	GO:0007267~cell-cell signaling	9	3.04054	0.0143265	CXCL10, CXCL11, CXCL9, IL15, CCL5, SIRPG, FASLG, TNFRSF11A, NGF	210	254	16792	2.8333	1	0.65949	0.656891
GOTERM_BP_DIRECT	GO:0002437~inflammatory response to antigenic stimulus	3	1.01351	0.0145514	IL20RB, RASGRP1, HLA-DRB1	210	15	16792	15.9924	1	0.65949	0.656891
GOTERM_BP_DIRECT	GO:0097191~extrinsic apoptotic signaling pathway	4	1.35135	0.015278	IFNG, FAS, FASLG, PML	210	42	16792	7.61542	1	0.668542	0.665908
GOTERM_BP_DIRECT	GO:0006919~activation of cysteine-type endopeptidase activity involved in apoptotic process	5	1.68919	0.0199685	CASP1, FAS, FASLG, NGF, PML	210	83	16792	4.81698	1	0.820573	0.817339
GOTERM_BP_DIRECT	GO:0042110~T cell activation	4	1.35135	0.0206282	CD2, CD8A, CD3G, SLA2	210	47	16792	6.80527	1	0.820573	0.817339
GOTERM_BP_DIRECT	GO:0002690~positive regulation of leukocyte chemotaxis	3	1.01351	0.0206921	CXCL10, CXCL11, CXCL9	210	18	16792	13.327	1	0.820573	0.817339
GOTERM_BP_DIRECT	GO:0002506~polysaccharide assembly with MHC class II protein complex	2	0.675676	0.0247386	HLA-DRA, HLA-DRB1	210	2	16792	79.9619	1	0.888165	0.884665
GOTERM_BP_DIRECT	GO:0006925~inflammatory cell apoptotic process	2	0.675676	0.0247386	FAS, FASLG	210	2	16792	79.9619	1	0.888165	0.884665
GOTERM_BP_DIRECT	GO:0060086~circadian temperature homeostasis	2	0.675676	0.0247386	NR1D1, TNFRSF11A	210	2	16792	79.9619	1	0.888165	0.884665
GOTERM_BP_DIRECT	GO:0006915~apoptotic process	14	4.72973	0.0251962	BEX2, RNF34, STAT1, TNFRSF9, GZMA, FASLG, PML, CD2, IFNG, IRF1, CASP1, FAS, TRIM69, BNIPL	210	567	16792	1.97437	1	0.888165	0.884665
GOTERM_BP_DIRECT	GO:0030099~myeloid cell differentiation	3	1.01351	0.0355566	GFI1, KAT8, PML	210	24	16792	9.99524	1	1	0.996845
GOTERM_BP_DIRECT	GO:0045590~negative regulation of regulatory T cell differentiation	2	0.675676	0.0368786	IRF1, CTLA4	210	3	16792	53.3079	1	1	0.996845
GOTERM_BP_DIRECT	GO:0051712~positive regulation of killing of cells of other organism	2	0.675676	0.0368786	IFNG, NOS2	210	3	16792	53.3079	1	1	0.996845
GOTERM_BP_DIRECT	GO:0033326~cerebrospinal fluid secretion	2	0.675676	0.0368786	C11ORF63, AQP1	210	3	16792	53.3079	1	1	0.996845
GOTERM_BP_DIRECT	GO:0019724~B cell mediated immunity	2	0.675676	0.0368786	FAS, SLA2	210	3	16792	53.3079	1	1	0.996845
GOTERM_BP_DIRECT	GO:0051899~membrane depolarization	3	1.01351	0.0383379	CACNB3, SCN5A, CACNG4	210	25	16792	9.59543	1	1	0.996845
GOTERM_BP_DIRECT	GO:0042102~positive regulation of T cell proliferation	4	1.35135	0.0387453	CD274, IFNG, IL15, CCL5	210	60	16792	5.33079	1	1	0.996845
GOTERM_BP_DIRECT	GO:0051281~positive regulation of release of sequestered calcium ion into cytosol	3	1.01351	0.0441384	CXCL10, CXCL11, CXCL9	210	27	16792	8.88466	1	1	0.996845
GOTERM_BP_DIRECT	GO:0032689~negative regulation of interferon-gamma production	3	1.01351	0.0471529	CD274, IL20RB, HLA-DRB1	210	28	16792	8.56735	1	1	0.996845
GOTERM_BP_DIRECT	GO:0046006~regulation of activated T cell proliferation	2	0.675676	0.0488681	CD274, IDO1	210	4	16792	39.981	1	1	0.996845

## Sheet: GOCC
Category	Term	Count	%	PValue	Genes	List Total	Pop Hits	Pop Total	Fold Enrichment	Bonferroni	Benjamini	FDR
GOTERM_CC_DIRECT	GO:0030666~endocytic vesicle membrane	4	14.2857	0.000124704	CD74, HLA-DRA, HLA-DRB1, CACNG4	28	66	18224	39.4459	0.0080735	0.00810576	0.00710813
GOTERM_CC_DIRECT	GO:0042613~MHC class II protein complex	3	10.7143	0.00047945	CD74, HLA-DRA, HLA-DRB1	28	22	18224	88.7532	0.0306909	0.0155821	0.0136643
GOTERM_CC_DIRECT	GO:0071556~integral component of lumenal side of endoplasmic reticulum membrane	3	10.7143	0.000837298	CD74, HLA-DRA, HLA-DRB1	28	29	18224	67.33	0.0529914	0.0181414	0.0159087
GOTERM_CC_DIRECT	GO:0030658~transport vesicle membrane	3	10.7143	0.00143794	CD74, HLA-DRA, HLA-DRB1	28	38	18224	51.3835	0.0892923	0.0190081	0.0166686
GOTERM_CC_DIRECT	GO:0030669~clathrin-coated endocytic vesicle membrane	3	10.7143	0.00167267	CD74, HLA-DRA, HLA-DRB1	28	41	18224	47.6237	0.103103	0.0190081	0.0166686
GOTERM_CC_DIRECT	GO:0005576~extracellular region	9	32.1429	0.00175459	MMP12, CXCL10, CXCL11, CXCL9, CCL5, GZMA, CASP1, APOL1, GBP1	28	1610	18224	3.63833	0.107875	0.0190081	0.0166686
GOTERM_CC_DIRECT	GO:0012507~ER to Golgi transport vesicle membrane	3	10.7143	0.00267783	CD74, HLA-DRA, HLA-DRB1	28	52	18224	37.5495	0.159949	0.0248655	0.0218052
GOTERM_CC_DIRECT	GO:0009897~external side of plasma membrane	4	14.2857	0.00374411	CXCL10, CD74, CXCL9, HLA-DRB1	28	213	18224	12.2227	0.216374	0.0304209	0.0266768
GOTERM_CC_DIRECT	GO:0032588~trans-Golgi network membrane	3	10.7143	0.006681	CD74, HLA-DRA, HLA-DRB1	28	83	18224	23.525	0.353202	0.0482516	0.042313
GOTERM_CC_DIRECT	GO:0005765~lysosomal membrane	4	14.2857	0.0075302	CD74, HLA-DRA, HLA-DRB1, SYT7	28	274	18224	9.50156	0.388179	0.0489463	0.0429221
GOTERM_CC_DIRECT	GO:0000139~Golgi membrane	5	17.8571	0.0106208	CD74, HLA-DRA, GBP1, GBP4, HLA-DRB1	28	591	18224	5.50641	0.500448	0.0627592	0.055035
GOTERM_CC_DIRECT	GO:0005615~extracellular space	6	21.4286	0.045235	CXCL10, PCSK1N, CXCL11, CXCL9, CCL5, APOL1	28	1347	18224	2.89914	0.950652	0.245023	0.214866
Category	Term	Count	%	PValue	Genes	List Total	Pop Hits	Pop Total	Fold Enrichment	Bonferroni	Benjamini	FDR
GOTERM_CC_DIRECT	GO:0009897~external side of plasma membrane	14	7.29167	5.90924e-08	CD274, CD74, CXCL9, GSR, TNFRSF11A, CD2, CXCL10, BCAM, CD8A, IL2RB, FAS, CTLA4, IL12RB1, HLA-DRB1	163	213	18224	7.3486	1.24093e-05	1.24094e-05	1.23503e-05
GOTERM_CC_DIRECT	GO:0042101~T cell receptor complex	4	2.08333	0.000510078	CD8A, CD3G, CD247, CD3D	163	18	18224	24.8453	0.101603	0.0535582	0.0533031
GOTERM_CC_DIRECT	GO:0042105~alpha-beta T cell receptor complex	3	1.5625	0.000771673	CD3G, CD247, CD3D	163	5	18224	67.0822	0.149656	0.0540171	0.0537599
GOTERM_CC_DIRECT	GO:0005829~cytosol	44	22.9167	0.00524711	GDI1, CAB39L, ALOX15, NLRC5, RNF19B, UBE2L6, TYMS, CYTH3, GMDS, CUX1, EPB41L1, HSF1, CASP1, NUDT18, TRIM69, ANXA9, GBP1, FARP1, WARS, NOS2, STAT1, TNNC1, TSC22D3, GSR, MOCOS, TRAPPC9, PGD, SYT7, PML, PSMB9, DOK2, PAN3, RGCC, ETNK2, IRF1, ATP6V1B2, PSME1, PSME2, EIF3H, FAS, CENPM, PABPC1, CHMP7, IDO1	163	3315	18224	1.48397	0.668721	0.275473	0.274161
GOTERM_CC_DIRECT	GO:0005887~integral component of plasma membrane	23	11.9792	0.00719393	EPHA10, UPK2, TAP1, NKG7, CD3G, CXCR6, TNFRSF11A, SLC7A1, AQP1, CD2, BCAM, CD8A, IL2RB, FAS, HLA-DRA, CTLA4, FAM26F, TIGIT, SLC18B1, GABRD, HLA-DRB1, CACNG4, SLC28A3	163	1415	18224	1.8173	0.780452	0.302145	0.300706
GOTERM_CC_DIRECT	GO:0042613~MHC class II protein complex	3	1.5625	0.0161449	CD74, HLA-DRA, HLA-DRB1	163	22	18224	15.246	0.967225	0.565072	0.562381
GOTERM_CC_DIRECT	GO:0030666~endocytic vesicle membrane	4	2.08333	0.0209762	CD74, HLA-DRA, HLA-DRB1, CACNG4	163	66	18224	6.77598	0.988343	0.629285	0.626289
GOTERM_CC_DIRECT	GO:0008537~proteasome activator complex	2	1.04167	0.0264332	PSME1, PSME2	163	3	18224	74.5358	0.996396	0.635871	0.632843
GOTERM_CC_DIRECT	GO:0071556~integral component of lumenal side of endoplasmic reticulum membrane	3	1.5625	0.0272516	CD74, HLA-DRA, HLA-DRB1	163	29	18224	11.5659	0.996979	0.635871	0.632843
GOTERM_CC_DIRECT	GO:0030658~transport vesicle membrane	3	1.5625	0.0448106	CD74, HLA-DRA, HLA-DRB1	163	38	18224	8.82661	0.999934	0.941022

## Sheet: GOMF
Category	Term	Count	%	PValue	Genes	List Total	Pop Hits	Pop Total	Fold Enrichment	Bonferroni	Benjamini	FDR
GOTERM_MF_DIRECT	GO:0048248~CXCR3 chemokine receptor binding	3	10.7143	2.27461e-05	CXCL10, CXCL11, CXCL9	27	5	16881	375.133	0.00204508	0.00204715	0.00204715
GOTERM_MF_DIRECT	GO:0008009~chemokine activity	4	14.2857	5.70128e-05	CXCL10, CXCL11, CXCL9, CCL5	27	49	16881	51.0385	0.00511816	0.00256558	0.00256558
GOTERM_MF_DIRECT	GO:0023026~MHC class II protein complex binding	3	10.7143	0.000270122	CD74, HLA-DRA, HLA-DRB1	27	16	16881	117.229	0.0240211	0.00810367	0.00810367
GOTERM_MF_DIRECT	GO:0032395~MHC class II receptor activity	2	7.14286	0.0228649	HLA-DRA, HLA-DRB1	27	15	16881	83.363	0.875285	0.433151	0.433151
GOTERM_MF_DIRECT	GO:0008201~heparin binding	3	10.7143	0.0250003	CXCL10, CXCL11, C6ORF15	27	160	16881	11.7229	0.897575	0.433151	0.433151
GOTERM_MF_DIRECT	GO:0019955~cytokine binding	2	7.14286	0.0288767	CD74, GBP1	27	19	16881	65.8129	0.928436	0.433151	0.433151
GOTERM_MF_DIRECT	GO:0042605~peptide antigen binding	2	7.14286	0.0422737	HLA-DRA, HLA-DRB1	27	28	16881	44.6587	0.979501	0.543519	0.543519
Category	Term	Count	%	PValue	Genes	List Total	Pop Hits	Pop Total	Fold Enrichment	Bonferroni	Benjamini	FDR
GOTERM_MF_DIRECT	GO:0048248~CXCR3 chemokine receptor binding	3	1.5625	0.000801634	CXCL10, CXCL11, CXCL9	154	5	16881	65.7701	0.230056	0.261333	0.261333
GOTERM_MF_DIRECT	GO:0005515~protein binding	96	50	0.0075424	RTP4, CIITA, CXCL9, GDI1, CAB39L, UPK2, GFI1, INTS10, SIRPG, RNF19B, UBE2L6, CCAR2, AQP1, PBK, CASP1, NUDT18, TRIM69, CTLA4, SUPT20H, ANXA9, PROSER2, GBP5, WARS, TNNC1, TAP1, SRCIN1, DOK2, BCAM, SCO2, STIM2, CD8A, IRF1, ATP6V1B2, PSME1, PSME2, PABPC1, CHMP7, HDAC5, CD274, BEX2, NUFIP1, FECH, ATF6B, EPHA10, CCDC68, TUFT1, PALM3, ATP5A1, ALOX15, NLRC5, TNFRSF11A, SLC7A1, KRT40, CYTH3, MED30, GMDS, …	154	8785	16881	1.19786	0.915258	0.685353	0.685353
GOTERM_MF_DIRECT	GO:0023026~MHC class II protein complex binding	3	1.5625	0.00901039	CD74, HLA-DRA, HLA-DRB1	154	16	16881	20.5532	0.947697	0.685353	0.685353
GOTERM_MF_DIRECT	GO:0008009~chemokine activity	4	2.08333	0.00991776	CXCL10, CXCL11, CXCL9, CCL5	154	49	16881	8.94832	0.9612	0.685353	0.685353
GOTERM_MF_DIRECT	GO:0019955~cytokine binding	3	1.5625	0.0126139	CD74, TNFRSF11A, GBP1	154	19	16881	17.3079	0.98405	0.685353	0.685353
GOTERM_MF_DIRECT	GO:0042288~MHC class I protein binding	3	1.5625	0.0126139	CD8A, ATP5A1, TAP1	154	19	16881	17.3079	0.98405	0.685353	0.685353
GOTERM_MF_DIRECT	GO:0042605~peptide antigen binding	3	1.5625	0.0264433	HLA-DRA, TAP1, HLA-DRB1	154	28	16881	11.7447	0.999839	1	1
GOTERM_MF_DIRECT	GO:0042803~protein homodimerization activity	13	6.77083	0.0337957	NOS2, STAT1, GZMA, TNNC1, TAP1, TYMS, PML, CD2, CD8A, CCL5, ANXA9, CD247, TIGIT	154	730	16881	1.95208	0.999986	1	1
GOTERM_MF_DIRECT	GO:0004896~cytokine receptor activity	3	1.5625	0.0420556	CD74, IL20RB, IL12RB1	154	36	16881	9.13474	0.999999	1	1
GOTERM_MF_DIRECT	GO:0044212~transcription regulatory region DNA binding	6	3.125	0.0447324	FOXA1, HDAC5, CIITA, ATF6B, GFI1, NR1D1	154	213	16881	3.0878

## Sheet: KEGG
Category	Term	Count	%	PValue	Genes	List Total	Pop Hits	Pop Total	Fold Enrichment	Bonferroni	Benjamini	FDR
KEGG_PATHWAY	hsa05164:Influenza A	5	17.8571	0.000167018	CXCL10, CCL5, CASP1, HLA-DRA, HLA-DRB1	13	174	6879	15.2056	0.0109636	0.00713161	0.00626717
KEGG_PATHWAY	hsa04062:Chemokine signaling pathway	5	17.8571	0.000216109	CXCL10, CXCL11, CXCL9, GNG4, CCL5	13	186	6879	14.2246	0.0141635	0.00713161	0.00626717
KEGG_PATHWAY	hsa04620:Toll-like receptor signaling pathway	4	14.2857	0.000707161	CXCL10, CXCL11, CXCL9, CCL5	13	106	6879	19.9681	0.045616	0.0155575	0.0136718
KEGG_PATHWAY	hsa05152:Tuberculosis	4	14.2857	0.00310473	CD74, NOS2, HLA-DRA, HLA-DRB1	13	177	6879	11.9583	0.185541	0.0450499	0.0395893
KEGG_PATHWAY	hsa05168:Herpes simplex infection	4	14.2857	0.00341287	CD74, CCL5, HLA-DRA, HLA-DRB1	13	183	6879	11.5662	0.201991	0.0450499	0.0395893
KEGG_PATHWAY	hsa04623:Cytosolic DNA-sensing pathway	3	10.7143	0.0052963	CXCL10, CCL5, CASP1	13	64	6879	24.8041	0.295653	0.0554381	0.0487183
KEGG_PATHWAY	hsa05140:Leishmaniasis	3	10.7143	0.00648429	NOS2, HLA-DRA, HLA-DRB1	13	71	6879	22.3586	0.349072	0.0554381	0.0487183
KEGG_PATHWAY	hsa04612:Antigen processing and presentation	3	10.7143	0.00740077	CD74, HLA-DRA, HLA-DRB1	13	76	6879	20.8877	0.387537	0.0554381	0.0487183
KEGG_PATHWAY	hsa04060:Cytokine-cytokine receptor interaction	4	14.2857	0.00755974	CXCL10, CXCL11, CXCL9, CCL5	13	243	6879	8.71035	0.393978	0.0554381	0.0487183
KEGG_PATHWAY	hsa05323:Rheumatoid arthritis	3	10.7143	0.00982552	CCL5, HLA-DRA, HLA-DRB1	13	88	6879	18.0393	0.478836	0.0648484	0.056988
KEGG_PATHWAY	hsa05145:Toxoplasmosis	3	10.7143	0.0150633	NOS2, HLA-DRA, HLA-DRB1	13	110	6879	14.4315	0.63276	0.0903797	0.0794246
Category	Term	Count	%	PValue	Genes	List Total	Pop Hits	Pop Total	Fold Enrichment	Bonferroni	Benjamini	FDR
KEGG_PATHWAY	hsa04612:Antigen processing and presentation	8	4.16667	1.65212e-05	CD74, CIITA, CD8A, PSME1, HLA-DRA, PSME2, TAP1, HLA-DRB1	76	76	6879	9.5277	0.00235977	0.00236254	0.00224689
KEGG_PATHWAY	hsa05164:Influenza A	9	4.6875	0.000567652	CXCL10, CIITA, STAT1, CCL5, CASP1, HLA-DRA, FAS, HLA-DRB1, PML	76	174	6879	4.68172	0.0779883	0.0405871	0.0386004
KEGG_PATHWAY	hsa04060:Cytokine-cytokine receptor interaction	10	5.20833	0.00121099	CXCL10, CXCL11, CXCL9, CCL5, IL2RB, FAS, IL20RB, CXCR6, TNFRSF11A, IL12RB1	76	243	6879	3.72482	0.159095	0.057724	0.0548984
KEGG_PATHWAY	hsa04640:Hematopoietic cell lineage	6	3.125	0.00248311	CD2, CD8A, HLA-DRA, CD3G, CD3D, HLA-DRB1	76	87	6879	6.24229	0.299196	0.0746637	0.0710089
KEGG_PATHWAY	hsa05323:Rheumatoid arthritis	6	3.125	0.00261062	CCL5, ATP6V1B2, HLA-DRA, CTLA4, TNFRSF11A, HLA-DRB1	76	88	6879	6.17135	0.31189	0.0746637	0.0710089
KEGG_PATHWAY	hsa05168:Herpes simplex infection	8	4.16667	0.00363056	CD74, STAT1, CCL5, HLA-DRA, FAS, TAP1, HLA-DRB1, PML	76	183	6879	3.95686	0.405547	0.0865283	0.0822926
KEGG_PATHWAY	hsa04514:Cell adhesion molecules (CAMs)	7	3.64583	0.00435571	CD2, CD274, CD8A, HLA-DRA, CTLA4, TIGIT, HLA-DRB1	76	142	6879	4.46192	0.464325	0.0889809	0.0846252
KEGG_PATHWAY	hsa05142:Chagas disease (American trypanosomiasis)	6	3.125	0.00535679	NOS2, CCL5, FAS, CD3G, CD247, CD3D	76	104	6879	5.22191	0.536097	0.0928629	0.0883172
KEGG_PATHWAY	hsa05340:Primary immunodeficiency	4	2.08333	0.00584452	CIITA, CD8A, TAP1, CD3D	76	34	6879	10.6486	0.56752	0.0928629	0.0883172
KEGG_PATHWAY	hsa05162:Measles	6	3.125	0.0146851	STAT1, IL2RB, FAS, EIF3H, CD3G, CD3D	76	133	6879	4.0833	0.879431	0.201649	0.191778
KEGG_PATHWAY	hsa04062:Chemokine signaling pathway	7	3.64583	0.0155114	CXCL10, CXCL11, CXCL9, GNG4, STAT1, CCL5, CXCR6	76	186	6879	3.40641	0.893063	0.201649	0.191778
KEGG_PATHWAY	hsa05320:Autoimmune thyroid disease	4	2.08333	0.018775	HLA-DRA, FAS, CTLA4, HLA-DRB1	76	52	6879	6.96255	0.933486	0.223735	0.212783
KEGG_PATHWAY	hsa04660:T cell receptor signaling pathway	5	2.60417	0.023277	CD8A, CTLA4, CD3G, CD247, CD3D	76	100	6879	4.52566	0.96554	0.256047	0.243513
KEGG_PATHWAY	hsa04620:Toll-like receptor signaling pathway	5	2.60417	0.028094	CXCL10, CXCL11, CXCL9, STAT1, CCL5	76	106	6879	4.26949	0.983007	0.28696	0.272913
KEGG_PATHWAY	hsa05145:Toxoplasmosis	5	2.60417	0.0316131	CIITA, NOS2, STAT1, HLA-DRA, HLA-DRB1	76	110	6879	4.11423	0.989884	0.288452	0.274332
KEGG_PATHWAY	hsa05321:Inflammatory bowel disease (IBD)	4	2.08333	0.0322743	STAT1, HLA-DRA, IL12RB1, HLA-DRB1	76	64	6879	5.65707	0.990826	0.288452	0.274332
KEGG_PATHWAY	hsa05140:Leishmaniasis	4	2.08333	0.0419638	NOS2, STAT1, HLA-DRA, HLA-DRB1	76	71	6879	5.09933	0.997824	0.344365	0.327508
KEGG_PATHWAY	hsa05152:Tuberculosis	6	3.125	0.0433467	CD74, CIITA, NOS2, STAT1, HLA-DRA, HLA-DRB1	76	177	6879	3.06824	0.99823	0.344365	0.327508
KEGG_PATHWAY	hsa05332:Graft-versus-host disease	3	1.5625	0.0498282	HLA-DRA, FAS, HLA-DRB1	76	33	6879	8.22847	0.999331	0.375023	0.356665
Category	Term	Count	%	PValue	Genes	List Total	Pop Hits	Pop Total	Fold Enrichment	Bonferroni	Benjamini	FDR
KEGG_PATHWAY	hsa04612:Antigen processing and presentation	10	3.37838	1.51788e-06	CD74, CIITA, IFNG, CD8A, PSME1, HLA-DRA, PSME2, TAP1, HLA-DRB1, KIR2DL4	103	76	6879	8.78769	0.000239796	0.000239824	0.000215538
KEGG_PATHWAY	hsa04060:Cytokine-cytokine receptor interaction	14	4.72973	5.50189e-05	CXCL9, IL15, TNFRSF9, IL20RB, FASLG, CXCR6, TNFRSF11A, CXCL10, CXCL11, IFNG, CCL5, IL2RB, FAS, IL12RB1	103	243	6879	3.84778	0.00865556	0.0043465	0.00390634
KEGG_PATHWAY	hsa05164:Influenza A	11	3.71622	0.000236195	CXCL10, CIITA, IFNG, STAT1, CCL5, CASP1, HLA-DRA, FAS, FASLG, HLA-DRB1, PML	103	174	6879	4.22213	0.0366352	0.0112136	0.0100781
KEGG_PATHWAY	hsa05323:Rheumatoid arthritis	8	2.7027	0.000304362	IFNG, IL15, CCL5, ATP6V1B2, HLA-DRA, CTLA4, TNFRSF11A, HLA-DRB1	103	88	6879	6.07149	0.0469583	0.0112136	0.0100781
KEGG_PATHWAY	hsa05168:Herpes simplex infection	11	3.71622	0.000354861	CD74, IFNG, IL15, STAT1, CCL5, HLA-DRA, FAS, TAP1, FASLG, HLA-DRB1, PML	103	183	6879	4.01448	0.0545346	0.0112136	0.0100781
KEGG_PATHWAY	hsa04660:T cell receptor signaling pathway	8	2.7027	0.000663931	IFNG, CD8A, CTLA4, CD3G, CD247, ICOS, CD3D, RASGRP1	103	100	6879	5.34291	0.0996178	0.0174835	0.015713
KEGG_PATHWAY	hsa05142:Chagas disease (American trypanosomiasis)	8	2.7027	0.000839582	IFNG, NOS2, CCL5, FAS, FASLG, CD3G, CD247, CD3D	103	104	6879	5.13742	0.124281	0.0189506	0.0170315
KEGG_PATHWAY	hsa04514:Cell adhesion molecules (CAMs)	9	3.04054	0.00115787	CD2, CD274, CD8A, MPZ, HLA-DRA, CTLA4, TIGIT, ICOS, HLA-DRB1	103	142	6879	4.23294	0.167273	0.0228679	0.0205521
KEGG_PATHWAY	hsa05332:Graft-versus-host disease	5	1.68919	0.00133992	IFNG, HLA-DRA, FAS, FASLG, HLA-DRB1	103	33	6879	10.1192	0.190914	0.0235231	0.021141
KEGG_PATHWAY	hsa05340:Primary immunodeficiency	5	1.68919	0.00150145	CIITA, CD8A, TAP1, ICOS, CD3D	103	34	6879	9.82153	0.21133	0.023723	0.0213206
KEGG_PATHWAY	hsa05330:Allograft rejection	5	1.68919	0.00206678	IFNG, HLA-DRA, FAS, FASLG, HLA-DRB1	103	37	6879	9.02519	0.278836	0.0296864	0.0266802
KEGG_PATHWAY	hsa04940:Type I diabetes mellitus	5	1.68919	0.00331004	IFNG, HLA-DRA, FAS, FASLG, HLA-DRB1	103	42	6879	7.95076	0.407766	0.0421451	0.0378772
KEGG_PATHWAY	hsa05162:Measles	8	2.7027	0.00346763	IFNG, STAT1, IL2RB, FAS, EIF3H, FASLG, CD3G, CD3D	103	133	6879	4.01723	0.422379	0.0421451	0.0378772
KEGG_PATHWAY	hsa05320:Autoimmune thyroid disease	5	1.68919	0.00715216	HLA-DRA, FAS, CTLA4, FASLG, HLA-DRB1	103	52	6879	6.42177	0.678289	0.0807172	0.0725433
KEGG_PATHWAY	hsa04640:Hematopoietic cell lineage	6	2.02703	0.00919022	CD2, CD8A, HLA-DRA, CD3G, CD3D, HLA-DRB1	103	87	6879	4.60596	0.767477	0.0968036	0.0870007
KEGG_PATHWAY	hsa05143:African trypanosomiasis	4	1.35135	0.01251	IFNG, FAS, FASLG, IDO1	103	33	6879	8.09532	0.863174	0.123536	0.111026
KEGG_PATHWAY	hsa05321:Inflammatory bowel disease (IBD)	5	1.68919	0.0146707	IFNG, STAT1, HLA-DRA, IL12RB1, HLA-DRB1	103	64	6879	5.21769	0.903204	0.136352	0.122544
KEGG_PATHWAY	hsa04062:Chemokine signaling pathway	8	2.7027	0.0201545	GNGT1, CXCL10, CXCL11, CXCL9, GNG4, STAT1, CCL5, CXCR6	103	186	6879	2.87253	0.959923	0.172528	0.155057
KEGG_PATHWAY	hsa05140:Leishmaniasis	5	1.68919	0.020747	IFNG, NOS2, STAT1, HLA-DRA, HLA-DRB1	103	71	6879	4.70327	0.963576	0.172528	0.155057
KEGG_PATHWAY	hsa05145:Toxoplasmosis	6	2.02703	0.0233476	CIITA, IFNG, NOS2, STAT1, HLA-DRA, HLA-DRB1	103	110	6879	3.64289	0.976071	0.184446	0.165768
KEGG_PATHWAY	hsa03050:Proteasome	4	1.35135	0.0270221	IFNG, PSME1, PSME2, PSMB9	103	44	6879	6.07149	0.986809	0.203309	0.182721
KEGG_PATHWAY	hsa04672:Intestinal immune network for IgA production	4	1.35135	0.0320526	IL15, HLA-DRA, ICOS, HLA-DRB1	103	47	6879	5.68395	0.994185	0.230196	0.206885
KEGG_PATHWAY	hsa04650:Natural killer cell mediated cytotoxicity	6	2.02703	0.0344593	IFNG, FAS, FASLG, CD247, CD244, KIR2DL4	103	122	6879	3.28458	0.996076	0.23672	0.212749
KEGG_PATHWAY	hsa05152:Tuberculosis	7	2.36486	0.0472271	CD74, CIITA, IFNG, NOS2, STAT1, HLA-DRA, HLA-DRB1	103	177	6879	2.64127	0.999521	0.310912	0.279427
